# Supplementary material for: Singlet and triplet excited states of a series of BODIPY dyes as calculated by TDDFT and DLPNO-STEOM-CCSD methods
Source: Royal Society of Chemistry journal article supplement (doi:10.1039/d4cp02920h), 2024-01-01
Supplement: d4cp02920h1.pdf [file d4cp02920h1.pdf]

## Supporting Information

# **Singlet and triplet excited states of a series of BODIPY dyes as calculated by TDDFT and DLPNO-STEOM-CCSD methods**

**Aoussaj Sbai<sup>1</sup> and Julien Guthmuller<sup>1\*</sup>**

*<sup>1</sup>Institute of Physics and Applied Computer Science, Faculty of Applied Physics and Mathematics,  
Gdańsk University of Technology, Narutowicza 11/12, 80233 Gdańsk, Poland.*

**Table S1:** Singlet excited state properties of BOD-Ph at the  $S_0$  geometry calculated in a vacuum with MN15.

| State                                                     | Transition   | Weight (%) | Energy(eV) | $\lambda$ (nm) | f     |
|-----------------------------------------------------------|--------------|------------|------------|----------------|-------|
| $S_1 \pi_{\text{BOD}} \rightarrow \pi_{\text{BOD}}^*$     | 108a -> 109a | 84         | 3.02       | 410            | 0.736 |
| $S_2 \pi_{\text{BOD}} \rightarrow \pi_{\text{BOD}}^*$     | 107a -> 109a | 93         | 3.63       | 341            | 0.067 |
| $S_3 \pi_{\text{BOD}} \rightarrow \pi_{\text{BOD}}^*$     | 106a -> 109a | 84         | 3.66       | 338            | 0.496 |
| $S_4 \pi_{\text{Ph}} \rightarrow \pi_{\text{BOD}}^*$      | 103a -> 109a | 75         | 4.15       | 299            | 0     |
| $S_5 n_{\text{I}} \rightarrow \pi_{\text{BOD}}^*$         | 105a -> 109a | 75         | 4.36       | 284            | 0     |
| $S_6 n_{\text{I}} \rightarrow \pi_{\text{BOD}}^*$         | 104a -> 109a | 98         | 4.37       | 283            | 0     |
| $S_7 \pi_{\text{BOD}} \rightarrow \sigma_{\text{I}}^*$    | 108a -> 112a | 46         | 4.43       | 279            | 0     |
| $S_8 \pi_{\text{BOD}} \rightarrow \sigma_{\text{I}}^*$    | 108a -> 113a | 54         | 4.50       | 275            | 0.002 |
| $S_9 \pi_{\text{Ph}} \rightarrow \pi_{\text{BOD}}^*$      | 102a -> 109a | 98         | 4.57       | 271            | 0.008 |
| $S_{10} \pi_{\text{BOD}} \rightarrow \pi_{\text{Ph}}^*$   | 108a -> 110a | 94         | 4.69       | 264            | 0     |
| $S_{11} \pi_{\text{BOD}} \rightarrow \pi_{\text{BOD}}^*$  | 101a -> 109a | 69         | 4.82       | 257            | 0.014 |
| $S_{12} \pi_{\text{BOD}} \rightarrow \pi_{\text{Ph}}^*$   | 108a -> 111a | 75         | 4.91       | 252            | 0.045 |
| $S_{13} \pi_{\text{BOD}} \rightarrow \pi_{\text{BOD}}^*$  | 100a -> 109a | 95         | 5.09       | 243            | 0.005 |
| $S_{14} \pi_{\text{BOD}} \rightarrow \sigma_{\text{I}}^*$ | 106a -> 112a | 44         | 5.25       | 236            | 0     |
| $S_{15} \pi_{\text{BOD}} \rightarrow \sigma_{\text{I}}^*$ | 106a -> 113a | 33         | 5.32       | 233            | 0     |
| $S_{16}$                                                  | 105a -> 112a | 45         | 5.39       | 230            | 0     |
| $S_{17}$                                                  | 104a -> 112a | 50         | 5.39       | 230            | 0     |
| $S_{18}$                                                  | 102a -> 110a | 45         | 5.43       | 228            | 0     |
| $S_{19}$                                                  | 98a -> 109a  | 94         | 5.62       | 220            | 0     |
| $S_{20} \pi_{\text{BOD}} \rightarrow \pi_{\text{BOD}}^*$  | 99a -> 109a  | 82         | 5.71       | 217            | 0.219 |
| $S_{21} \pi_{\text{BOD}} \rightarrow \pi_{\text{Ph}}^*$   | 106a -> 110a | 88         | 5.80       | 213            | 0.001 |
| $S_{22} \pi_{\text{BOD}} \rightarrow \pi_{\text{Ph}}^*$   | 107a -> 110a | 97         | 5.88       | 210            | 0     |
| $S_{23} \pi_{\text{BOD}} \rightarrow \pi_{\text{Ph}}^*$   | 106a -> 111a | 94         | 5.93       | 209            | 0.011 |
| $S_{24} \pi_{\text{BOD}} \rightarrow \pi_{\text{Ph}}^*$   | 107a -> 111a | 96         | 6.01       | 206            | 0.002 |
| $S_{25}$                                                  | 108a -> 114a | 63         | 6.20       | 200            | 0.295 |
| $S_{26}$                                                  | 97a -> 109a  | 92         | 6.22       | 199            | 0     |
| $S_{27}$                                                  | 96a -> 109a  | 87         | 6.25       | 198            | 0.005 |
| $S_{28} \pi_{\text{BOD}} \rightarrow \sigma_{\text{I}}^*$ | 100a -> 112a | 42         | 6.38       | 194            | 0     |
| $S_{29} \pi_{\text{BOD}} \rightarrow \sigma_{\text{I}}^*$ | 100a -> 113a | 38         | 6.40       | 193            | 0     |
| $S_{30}$                                                  | 102a -> 111a | 33         | 6.409      | 193            | 0.029 |

**Table S2:** Triplet excited state properties of BOD-Ph at the  $S_0$  geometry calculated in a vacuum with MN15.

| State                                                                               | Transition   | Weight (%) | Energy(eV) | $\lambda$ (nm) | f |
|-------------------------------------------------------------------------------------|--------------|------------|------------|----------------|---|
| <b>T<sub>1</sub> <math>\pi_{\text{BOD}} \rightarrow \pi_{\text{BOD}}^*</math></b>   | 108a -> 109a | 93         | 1.59       | 779            | 0 |
| <b>T<sub>2</sub> <math>\pi_{\text{BOD}} \rightarrow \pi_{\text{BOD}}^*</math></b>   | 106a -> 109a | 85         | 2.77       | 447            | 0 |
| <b>T<sub>3</sub> <math>\pi_{\text{BOD}} \rightarrow \pi_{\text{BOD}}^*</math></b>   | 107a -> 109a | 84         | 2.93       | 422            | 0 |
| <b>T<sub>4</sub> <math>\pi_{\text{BOD}} \rightarrow \pi_{\text{BOD}}^*</math></b>   | 101a -> 109a | 73         | 3.51       | 353            | 0 |
| <b>T<sub>5</sub> <math>\pi_{\text{BOD}} \rightarrow \sigma_{\text{I}}^*</math></b>  | 108a -> 112a | 45         | 3.91       | 319            | 0 |
| <b>T<sub>6</sub> <math>\pi_{\text{BOD}} \rightarrow \sigma_{\text{I}}^*</math></b>  | 108a -> 113a | 40         | 3.95       | 314            | 0 |
| T <sub>7</sub>                                                                      | 103a -> 110a | 55         | 4.10       | 302            | 0 |
| <b>T<sub>8</sub> <math>\pi_{\text{Ph}} \rightarrow \pi_{\text{BOD}}^*</math></b>    | 103a -> 109a | 75         | 4.13       | 300            | 0 |
| T <sub>9</sub>                                                                      | 105a -> 109a | 76         | 4.34       | 286            | 0 |
| T <sub>10</sub>                                                                     | 104a -> 109a | 98         | 4.36       | 285            | 0 |
| <b>T<sub>11</sub> <math>\pi_{\text{Ph}} \rightarrow \pi_{\text{BOD}}^*</math></b>   | 102a -> 109a | 99         | 4.55       | 272            | 0 |
| T <sub>12</sub>                                                                     | 105a -> 112a | 50         | 4.60       | 269            | 0 |
| T <sub>13</sub>                                                                     | 104a -> 112a | 52         | 4.61       | 269            | 0 |
| <b>T<sub>14</sub> <math>\pi_{\text{BOD}} \rightarrow \pi_{\text{Ph}}^*</math></b>   | 108a -> 110a | 86         | 4.65       | 267            | 0 |
| <b>T<sub>15</sub> <math>\pi_{\text{BOD}} \rightarrow \pi_{\text{Ph}}^*</math></b>   | 108a -> 111a | 47         | 4.69       | 264            | 0 |
| T <sub>16</sub>                                                                     | 102a -> 110  | 36         | 4.73       | 262            | 0 |
| T <sub>17</sub>                                                                     | 101a -> 109a | 14         | 4.74       | 261            | 0 |
| T <sub>18</sub>                                                                     | 100a -> 109a | 86         | 4.90       | 252            | 0 |
| <b>T<sub>19</sub> <math>\pi_{\text{BOD}} \rightarrow \sigma_{\text{I}}^*</math></b> | 108a -> 112a | 52         | 5.10       | 243            | 0 |
| T <sub>20</sub>                                                                     | 99a -> 109a  | 53         | 5.11       | 243            | 0 |
| T <sub>21</sub>                                                                     | 99a -> 109a  | 23         | 5.16       | 241            | 0 |
| T <sub>22</sub>                                                                     | 102a -> 110a | 46         | 5.19       | 239            | 0 |
| <b>T<sub>23</sub> <math>\pi_{\text{BOD}} \rightarrow \sigma_{\text{I}}^*</math></b> | 108a -> 113a | 48         | 5.21       | 238            | 0 |
| T <sub>24</sub>                                                                     | 108a -> 115a | 80         | 5.33       | 232            | 0 |
| T <sub>25</sub>                                                                     | 98a -> 109a  | 45         | 5.54       | 224            | 0 |
| T <sub>26</sub>                                                                     | 107a -> 115a | 17         | 5.76       | 215            | 0 |
| <b>T<sub>27</sub> <math>\pi_{\text{BOD}} \rightarrow \pi_{\text{Ph}}^*</math></b>   | 106a -> 110a | 89         | 5.80       | 214            | 0 |
| <b>T<sub>28</sub> <math>\pi_{\text{BOD}} \rightarrow \pi_{\text{Ph}}^*</math></b>   | 107a -> 110a | 96         | 5.88       | 211            | 0 |
| T <sub>29</sub>                                                                     | 107a -> 111a | 32         | 5.89       | 211            | 0 |
| T <sub>30</sub>                                                                     | 106a -> 111a | 57         | 5.92       | 210            | 0 |

**Table S3:** Molecular orbitals of BOD-Ph at the  $S_0$  geometry calculated in a vacuum with MN15.

|                                                                                     |                                                                                     |                                                                                      |                                                                                       |
|-------------------------------------------------------------------------------------|-------------------------------------------------------------------------------------|--------------------------------------------------------------------------------------|---------------------------------------------------------------------------------------|
| 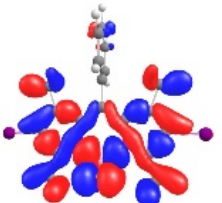   |    |    |    |
| MO 98                                                                               | MO 99                                                                               | MO 100                                                                               | MO 101                                                                                |
|    |    |    |    |
| MO 102                                                                              | MO 103                                                                              | MO 104                                                                               | MO 105                                                                                |
|    |    |    |    |
| MO 106                                                                              | MO 107                                                                              | MO 108                                                                               | MO 109                                                                                |
|   |   |   |   |
| MO 110                                                                              | MO 111                                                                              | MO 112                                                                               | MO 113                                                                                |
|  |  |  |  |
| MO 114                                                                              | MO 115                                                                              | MO 116                                                                               | MO 117                                                                                |
|  |                                                                                     |                                                                                      |                                                                                       |
| MO 118                                                                              |                                                                                     |                                                                                      |                                                                                       |

**Table S4:** CDDs of BOD-Ph singlet states at the  $S_0$  geometry calculated in a vacuum with MN15.

|                                                                                     |                                                                                     |                                                                                      |                                                                                       |
|-------------------------------------------------------------------------------------|-------------------------------------------------------------------------------------|--------------------------------------------------------------------------------------|---------------------------------------------------------------------------------------|
| 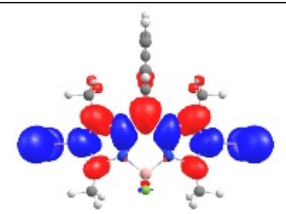   |    |    |    |
| CDDsinglets01                                                                       | CDDsinglets02                                                                       | CDDsinglets03                                                                        | CDDsinglets04                                                                         |
|    |    |    |    |
| CDDsinglets05                                                                       | CDDsinglets06                                                                       | CDDsinglets07                                                                        | CDDsinglets08                                                                         |
|    |    |    |    |
| CDDsinglets09                                                                       | CDDsinglets10                                                                       | CDDsinglets11                                                                        | CDDsinglets12                                                                         |
|   |   |   |   |
| CDDsinglets13                                                                       | CDDsinglets14                                                                       | CDDsinglets15                                                                        | CDDsinglets16                                                                         |
|  |  |  |  |
| CDDsinglets17                                                                       | CDDsinglets18                                                                       | CDDsinglets19                                                                        | CDDsinglets20                                                                         |
|  |  |  |  |
| CDDsinglets21                                                                       | CDDsinglets22                                                                       | CDDsinglets23                                                                        | CDDsinglets24                                                                         |
|  |  |  |  |
| CDDsinglets25                                                                       | CDDsinglets26                                                                       | CDDsinglets27                                                                        | CDDsinglets28                                                                         |

|                                                                                   |                                                                                   |  |  |
|-----------------------------------------------------------------------------------|-----------------------------------------------------------------------------------|--|--|
| 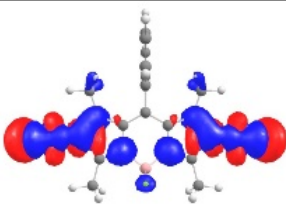 |  |  |  |
| CDDsinglets29                                                                     | CDDsinglets30                                                                     |  |  |

**Table S5:** CDDs of BOD-Ph triplet states at the  $S_0$  geometry calculated in a vacuum with MN15.

|                                                                                     |                                                                                     |                                                                                      |                                                                                       |
|-------------------------------------------------------------------------------------|-------------------------------------------------------------------------------------|--------------------------------------------------------------------------------------|---------------------------------------------------------------------------------------|
| 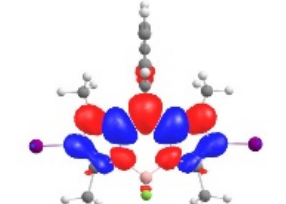   |    |    |    |
| CDDtriplets01                                                                       | CDDtriplets02                                                                       | CDDtriplets03                                                                        | CDDtriplets04                                                                         |
|    |    |    |    |
| CDDtriplets05                                                                       | CDDtriplets06                                                                       | CDDtriplets07                                                                        | CDDtriplets08                                                                         |
|   |   |   |   |
| CDDtriplets09                                                                       | CDDtriplets10                                                                       | CDDtriplets11                                                                        | CDDtriplets12                                                                         |
|  |  |  |  |
| CDDtriplets13                                                                       | CDDtriplets14                                                                       | CDDtriplets15                                                                        | CDDtriplets16                                                                         |
|  |  |  |  |
| CDDtriplets17                                                                       | CDDtriplets18                                                                       | CDDtriplets19                                                                        | CDDtriplets20                                                                         |



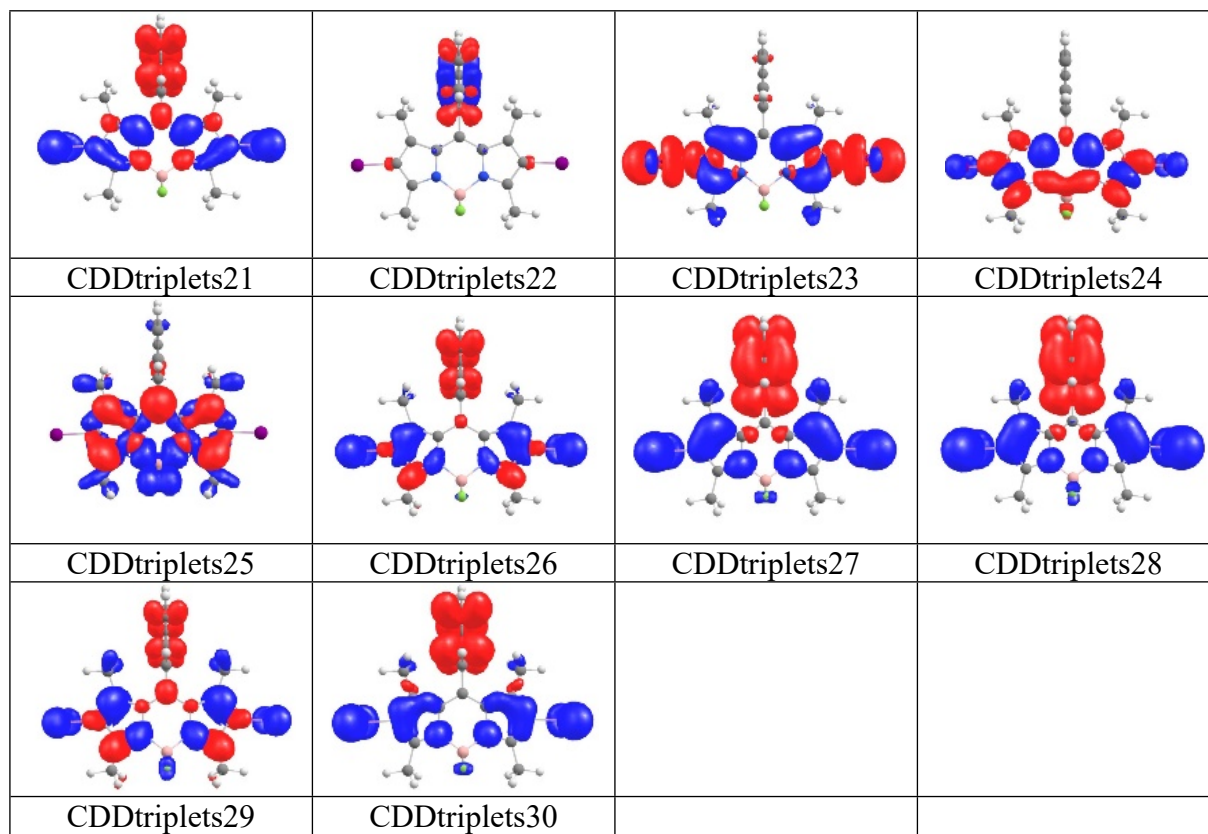

**Table S6:** Singlet excited state properties of BOD-Ph at the  $S_0$  geometry calculated in a vacuum with DLPNO-STEOM-CCSD/def2-TZVP.

| State                                                    | Transition           | Weight (%) | Energy(eV) | $\lambda$ (nm) | f     | Percentage Active Character |
|----------------------------------------------------------|----------------------|------------|------------|----------------|-------|-----------------------------|
| $S_1 \pi_{\text{BOD}} \rightarrow \pi_{\text{BOD}}^*$    | 108->109<br>106->109 | 89<br>4    | 2.09       | 594            | 0.543 | 97.82                       |
| $S_2 \pi_{\text{BOD}} \rightarrow \pi_{\text{BOD}}^*$    | 106->109<br>108->109 | 82<br>7    | 3.41       | 363            | 0.201 | 97.82                       |
| $S_3 \pi_{\text{BOD}} \rightarrow \pi_{\text{BOD}}^*$    | 107->109<br>101->109 | 76<br>15   | 3.48       | 356            | 0.067 | 98.13                       |
| $S_4 \pi_{\text{Ph}} \rightarrow \pi_{\text{BOD}}^*$     | 105->109<br>102->109 | 95<br>2    | 4.34       | 286            | 0.000 | 98.24                       |
| $S_5 \pi_{\text{BOD}} \rightarrow \sigma_1^*$            | 108->112<br>107->113 | 46<br>28   | 4.49       | 276            | 0.000 | 99.22                       |
| $S_6 \pi_{\text{BOD}} \rightarrow \sigma_1^*$            | 108->113<br>107->112 | 37<br>36   | 4.56       | 272            | 0.000 | 99.27                       |
| $S_7 \pi_{\text{BOD}} \rightarrow \pi_{\text{BOD}}^*$    | 101->109<br>107->109 | 77<br>12   | 4.66       | 266            | 0.146 | 97.99                       |
| $S_8$                                                    | 105->111<br>104->110 | 47<br>44   | 4.68       | 265            | 0.000 | 98.13                       |
| $S_9 \pi_{\text{Ph}} \rightarrow \pi_{\text{BOD}}^*$     | 104->109             | 98         | 4.84       | 256            | 0.003 | 99.30                       |
| $S_{10} \pi_{\text{BOD}} \rightarrow \pi_{\text{Ph}}^*$  | 108->110             | 93         | 4.93       | 252            | 0.000 | 99.31                       |
| $S_{11} n_1 \rightarrow \pi_{\text{BOD}}^*$              | 102->109             | 96         | 5.01       | 248            | 0.000 | 99.24                       |
| $S_{12} n_1 \rightarrow \pi_{\text{BOD}}^*$              | 103->109             | 96         | 5.06       | 245            | 0.000 | 99.47                       |
| $S_{13} \pi_{\text{BOD}} \rightarrow \pi_{\text{Ph}}^*$  | 108->111             | 90         | 5.08       | 244            | 0.106 | 99.15                       |
| $S_{14}$                                                 | 102->112<br>103->113 | 43<br>40   | 5.42       | 229            | 0.003 | 99.27                       |
| $S_{15}$                                                 | 103->112<br>102->113 | 51<br>45   | 5.42       | 229            | 0.000 | 99.22                       |
| $S_{16} \pi_{\text{BOD}} \rightarrow \sigma_1^*$         | 108->112<br>107->113 | 41<br>19   | 5.43       | 228            | 0.000 | 99.09                       |
| $S_{17} \pi_{\text{BOD}} \rightarrow \pi_{\text{BOD}}^*$ | 100->109             | 82         | 5.52       | 225            | 0.025 | 99.00                       |
| $S_{18} \pi_{\text{BOD}} \rightarrow \sigma_1^*$         | 108->113<br>107->112 | 49<br>18   | 5.55       | 223            | 0.000 | 99.29                       |
| $S_{19} \pi_{\text{BOD}} \rightarrow \pi_{\text{BOD}}^*$ | 99->109              | 84         | 5.73       | 216            | 0.093 | 98.63                       |
| $S_{20}$                                                 | 108->115<br>108->111 | 75<br>5    | 5.91       | 210            | 0.084 | 98.50                       |
| $S_{21}$                                                 | 108->114             | 85         | 6.08       | 204            | 0.000 | 98.92                       |
| $S_{22}$                                                 | 108->119<br>108->117 | 79<br>7    | 6.11       | 203            | 0.149 | 97.74                       |
| $S_{23}$                                                 | 105->110<br>104->111 | 49<br>24   | 6.19       | 200            | 0.007 | 98.17                       |
| $S_{24} \pi_{\text{BOD}} \rightarrow \sigma_1^*$         | 100->112<br>99->113  | 53<br>26   | 6.53       | 190            | 0.000 | 99.06                       |
| $S_{25} \pi_{\text{BOD}} \rightarrow \sigma_1^*$         | 100->113<br>99->112  | 46<br>30   | 6.56       | 189            | 0.000 | 99.07                       |



|                 |                                  |               |      |     |       |       |
|-----------------|----------------------------------|---------------|------|-----|-------|-------|
| S <sub>26</sub> | 104->110<br>105->111             | 41<br>38      | 6.92 | 179 | 0.257 | 94.85 |
| S <sub>27</sub> | 104->111<br>105->110             | 42<br>17      | 6.95 | 178 | 0.555 | 96.12 |
| S <sub>28</sub> | 108->118<br>104->110<br>105->111 | 58<br>9<br>10 | 7.02 | 177 | 0.119 | 91.66 |
| S <sub>29</sub> | 108->116<br>106->114             | 31<br>32      | 7.17 | 173 | 0.004 | 96.85 |
| S <sub>30</sub> | 108->117<br>101->111             | 59<br>8       | 7.38 | 168 | 0.012 | 88.55 |

**Table S7:** Triplet excited state properties of BOD-Ph at the S<sub>0</sub> geometry calculated in a vacuum with DLPNO-STEOM-CCSD/def2-TZVP.

| State                                                                              | Transition               | Weight (%) | Energy(eV) | $\lambda$ (nm) | f | Percentage Active Character |
|------------------------------------------------------------------------------------|--------------------------|------------|------------|----------------|---|-----------------------------|
| <b>T<sub>1</sub> <math>\pi_{\text{BOD}} \rightarrow \pi_{\text{BOD}}^*</math></b>  | 108 -> 109               | 94         | 1.38       | 902            | 0 | 99.32                       |
| <b>T<sub>2</sub> <math>\pi_{\text{BOD}} \rightarrow \pi_{\text{BOD}}^*</math></b>  | 106 -> 109<br>100 -> 109 | 77<br>11   | 2.56       | 485            | 0 | 99.09                       |
| <b>T<sub>3</sub> <math>\pi_{\text{BOD}} \rightarrow \pi_{\text{BOD}}^*</math></b>  | 107 -> 109<br>101 -> 109 | 54<br>33   | 2.74       | 452            | 0 | 98.37                       |
| <b>T<sub>4</sub> <math>\pi_{\text{BOD}} \rightarrow \pi_{\text{BOD}}^*</math></b>  | 101 -> 109<br>107 -> 109 | 46<br>29   | 3.27       | 379            | 0 | 98.58                       |
| T <sub>5</sub>                                                                     | 105 -> 110<br>104 -> 111 | 51<br>41   | 3.44       | 360            | 0 | 96.39                       |
| <b>T<sub>6</sub> <math>\pi_{\text{BOD}} \rightarrow \sigma_{\text{I}}^*</math></b> | 108 -> 112<br>107 -> 113 | 36<br>33   | 4.02       | 308            | 0 | 99.25                       |
| <b>T<sub>7</sub> <math>\pi_{\text{BOD}} \rightarrow \sigma_{\text{I}}^*</math></b> | 107 -> 112<br>108 -> 113 | 40<br>30   | 4.07       | 304            | 0 | 99.34                       |
| <b>T<sub>8</sub> <math>\pi_{\text{Ph}} \rightarrow \pi_{\text{BOD}}^*</math></b>   | 105 -> 109               | 94         | 4.33       | 287            | 0 | 97.85                       |
| T <sub>9</sub>                                                                     | 108 -> 115<br>108 -> 111 | 57<br>25   | 4.61       | 269            | 0 | 98.96                       |
| T <sub>10</sub>                                                                    | 104 -> 111<br>105 -> 110 | 54<br>41   | 4.62       | 268            | 0 | 99.19                       |
| T <sub>11</sub>                                                                    | 104 -> 110<br>105 -> 111 | 47<br>48   | 4.62       | 268            | 0 | 99.14                       |
| T <sub>12</sub>                                                                    | 102 -> 112<br>103 -> 113 | 50<br>47   | 4.79       | 259            | 0 | 99.28                       |
| T <sub>13</sub>                                                                    | 102 -> 113<br>103 -> 112 | 46<br>51   | 4.79       | 259            | 0 | 99.27                       |
| <b>T<sub>14</sub> <math>\pi_{\text{Ph}} \rightarrow \pi_{\text{BOD}}^*</math></b>  | 104 -> 109               | 98         | 4.80       | 259            | 0 | 99.56                       |
| <b>T<sub>15</sub> <math>\pi_{\text{BOD}} \rightarrow \pi_{\text{Ph}}^*</math></b>  | 108 -> 110               | 92         | 4.88       | 254            | 0 | 99.19                       |
| <b>T<sub>16</sub> <math>n_{\text{I}} \rightarrow \pi_{\text{BOD}}^*</math></b>     | 102 -> 109               | 96         | 4.99       | 248            | 0 | 99.15                       |
| T <sub>17</sub>                                                                    | 108 -> 116<br>106 -> 116 | 72<br>4    | 5.04       | 246            | 0 | 98.47                       |
| T <sub>18</sub>                                                                    | 103 -> 109               | 97         | 5.04       | 246            | 0 | 99.53                       |

|                                                                    |                          |          |      |     |   |       |
|--------------------------------------------------------------------|--------------------------|----------|------|-----|---|-------|
| T <sub>19</sub>                                                    | 103 -> 109               | 97       | 5.04 | 246 | 0 | 99.52 |
| T <sub>20</sub> $\pi_{\text{BOD}} \rightarrow \pi_{\text{Ph}}^*$   | 108 -> 111<br>108 -> 115 | 67<br>23 | 5.31 | 234 | 0 | 99.48 |
| T <sub>21</sub> $\pi_{\text{BOD}} \rightarrow \sigma_{\text{I}}^*$ | 108 -> 112<br>106 -> 112 | 50<br>21 | 5.32 | 233 | 0 | 98.52 |
| T <sub>22</sub> $\pi_{\text{BOD}} \rightarrow \sigma_{\text{I}}^*$ | 108 -> 113<br>106 -> 113 | 53<br>14 | 5.47 | 227 | 0 | 98.92 |
| T <sub>23</sub>                                                    | 104 -> 110<br>105 -> 111 | 49<br>44 | 5.53 | 224 | 0 | 99.44 |
| T <sub>24</sub>                                                    | 108 -> 117<br>107 -> 116 | 30<br>20 | 5.58 | 222 | 0 | 98.94 |
| T <sub>25</sub> $\pi_{\text{BOD}} \rightarrow \pi_{\text{BOD}}^*$  | 108 -> 117<br>106 -> 115 | 30<br>12 | 5.59 | 222 | 0 | 99.07 |
| T <sub>26</sub>                                                    | 106 -> 116<br>101 -> 115 | 33<br>14 | 5.83 | 213 | 0 | 97.42 |
| T <sub>27</sub>                                                    | 108 -> 114<br>108 -> 119 | 78<br>8  | 5.95 | 209 | 0 | 86.31 |
| T <sub>28</sub>                                                    | 100 -> 112<br>99 -> 113  | 46<br>24 | 6.07 | 204 | 0 | 98.34 |
| T <sub>29</sub>                                                    | 100 -> 113<br>99 -> 112  | 41<br>28 | 6.10 | 203 | 0 | 98.63 |
| T <sub>30</sub>                                                    | 97 -> 112<br>98 -> 113   | 45<br>47 | 6.63 | 187 | 0 | 95.12 |

**Table S8:** Singlet excited state properties of BOD-Ph at the S<sub>0</sub> geometry calculated in a vacuum with DLPNO-STEOM-CCSD/def2-SVP.

| State           | Transition | Weight (%) | Energy(eV) | $\lambda$ (nm) | f     | Percentage Active Character |
|-----------------|------------|------------|------------|----------------|-------|-----------------------------|
| S <sub>1</sub>  | 108 -> 109 | 88         | 2.10       | 591            | 0.536 | 98.08                       |
| S <sub>2</sub>  | 106 -> 109 | 81         | 3.47       | 358            | 0.226 | 98.30                       |
| S <sub>3</sub>  | 107 -> 109 | 78         | 3.49       | 356            | 0.076 | 98.85                       |
| S <sub>4</sub>  | 105 -> 109 | 95         | 4.44       | 279            | 0.000 | 98.88                       |
| S <sub>5</sub>  | 104 -> 110 | 48         | 4.71       | 263            | 0.000 | 98.59                       |
| S <sub>6</sub>  | 101 -> 109 | 79         | 4.73       | 262            | 0.149 | 98.21                       |
| S <sub>7</sub>  | 108 -> 112 | 41         | 4.75       | 261            | 0.000 | 99.32                       |
| S <sub>8</sub>  | 107 -> 112 | 38         | 4.80       | 258            | 0.001 | 99.33                       |
| S <sub>9</sub>  | 104 -> 109 | 98         | 4.94       | 251            | 0.003 | 99.67                       |
| S <sub>10</sub> | 103 -> 109 | 94         | 4.99       | 248            | 0.000 | 98.51                       |
| S <sub>11</sub> | 102 -> 109 | 97         | 5.02       | 247            | 0.000 | 99.58                       |
| S <sub>12</sub> | 108 -> 110 | 97         | 5.17       | 240            | 0.000 | 99.53                       |
| S <sub>13</sub> | 108 -> 111 | 91         | 5.40       | 229            | 0.069 | 99.38                       |
| S <sub>14</sub> | 100 -> 109 | 84         | 5.47       | 227            | 0.035 | 98.78                       |
| S <sub>15</sub> | 102 -> 112 | 33         | 5.61       | 221            | 0.000 | 99.18                       |
| S <sub>16</sub> | 103 -> 112 | 32         | 5.61       | 221            | 0.000 | 99.11                       |
| S <sub>17</sub> | 99 -> 109  | 82         | 5.71       | 217            | 0.090 | 98.79                       |
| S <sub>18</sub> | 108 -> 112 | 45         | 5.74       | 216            | 0.000 | 99.26                       |

|                 |            |    |      |     |       |       |
|-----------------|------------|----|------|-----|-------|-------|
| S <sub>19</sub> | 106 -> 113 | 22 | 5.86 | 212 | 0.001 | 99.45 |
| S <sub>20</sub> | 108 -> 114 | 75 | 6.12 | 203 | 0.080 | 98.75 |
| S <sub>21</sub> | 108 -> 116 | 82 | 6.37 | 195 | 0.046 | 98.11 |
| S <sub>22</sub> | 98 -> 109  | 92 | 6.59 | 188 | 0.000 | 94.88 |
| S <sub>23</sub> | 107 -> 111 | 33 | 6.78 | 183 | 0.593 | 97.48 |
| S <sub>24</sub> | 100 -> 112 | 51 | 6.80 | 182 | 0.000 | 99.12 |
| S <sub>25</sub> | 100 -> 113 | 46 | 6.82 | 182 | 0.000 | 99.19 |
| S <sub>26</sub> | 104 -> 111 | 40 | 7.25 | 171 | 0.556 | 96.67 |
| S <sub>27</sub> | 104 -> 110 | 45 | 7.28 | 170 | 0.386 | 95.11 |

**Table S9:** Triplet excited state properties of BOD-Ph at the S<sub>0</sub> geometry calculated in a vacuum with DLPNO-STEOM-CCSD/def2-SVP.

| State           | Transition               | Weight (%) | Energy(eV) | $\lambda$ (nm) | f | Percentage Active Character |
|-----------------|--------------------------|------------|------------|----------------|---|-----------------------------|
| T <sub>1</sub>  | 108 -> 109               | 95         | 1.44       | 860            | 0 | 99.44                       |
| T <sub>2</sub>  | 106 -> 109               | 75         | 2.59       | 480            | 0 | 99.16                       |
| T <sub>3</sub>  | 107 -> 109<br>101 -> 109 | 54<br>55   | 2.76       | 449            | 0 | 98.34                       |
| T <sub>4</sub>  | 101 -> 109<br>107 -> 109 | 44<br>29   | 3.33       | 373            | 0 | 98.53                       |
| T <sub>5</sub>  | 105 -> 110<br>104 -> 111 | 51<br>41   | 3.41       | 364            | 0 | 96.54                       |
| T <sub>6</sub>  | 107 -> 113<br>108 -> 112 | 35<br>33   | 4.18       | 297            | 0 | 99.40                       |
| T <sub>7</sub>  | 107 -> 112               | 40         | 4.22       | 294            | 0 | 99.43                       |
| T <sub>8</sub>  | 105 -> 109               | 95         | 4.45       | 279            | 0 | 98.08                       |
| T <sub>9</sub>  | 104 -> 111<br>105 -> 110 | 43<br>33   | 4.77       | 260            | 0 | 99.36                       |
| T <sub>10</sub> | 104 -> 110<br>105 -> 111 | 38<br>37   | 4.77       | 260            | 0 | 99.31                       |
| T <sub>11</sub> | 108 -> 114               | 65         | 4.80       | 258            | 0 | 98.82                       |
| T <sub>12</sub> | 102 -> 112<br>103 -> 112 | 32<br>26   | 4.88       | 254            | 0 | 99.46                       |
| T <sub>13</sub> | 102 -> 112<br>103 -> 112 | 31<br>26   | 4.88       | 254            | 0 | 99.49                       |
| T <sub>14</sub> | 104 -> 109               | 98         | 4.91       | 253            | 0 | 99.61                       |
| T <sub>15</sub> | 103 -> 109               | 92         | 4.98       | 249            | 0 | 98.63                       |
| T <sub>16</sub> | 102 -> 109               | 92         | 5.01       | 248            | 0 | 99.57                       |
| T <sub>17</sub> | 108 -> 110               | 96         | 5.17       | 240            | 0 | 99.13                       |
| T <sub>18</sub> | 108 -> 115<br>102 -> 109 | 49<br>24   | 5.20       | 239            | 0 | 98.29                       |
| T <sub>19</sub> | 100 -> 109<br>99 -> 109  | 43<br>13   | 5.53       | 224            | 0 | 97.20                       |

|                 |                          |          |      |     |   |       |
|-----------------|--------------------------|----------|------|-----|---|-------|
| T <sub>20</sub> | 108 -> 111<br>108 -> 116 | 54<br>14 | 5.57 | 223 | 0 | 99.22 |
| T <sub>21</sub> | 99 -> 109<br>108 -> 116  | 19<br>11 | 5.57 | 223 | 0 | 99.22 |
| T <sub>22</sub> | 108 -> 112<br>106 -> 112 | 53<br>16 | 5.58 | 222 | 0 | 98.83 |
| T <sub>23</sub> | 99 -> 109                | 65       | 5.63 | 220 | 0 | 99.35 |
| T <sub>24</sub> | 108 -> 113               | 56       | 5.72 | 217 | 0 | 99.06 |
| T <sub>25</sub> | 104 -> 110<br>105 -> 111 | 47<br>47 | 5.88 | 211 | 0 | 99.67 |
| T <sub>26</sub> | 100 -> 113<br>99 -> 112  | 29<br>17 | 6.38 | 194 | 0 | 98.28 |
| T <sub>27</sub> | 97 -> 112<br>98 -> 112   | 27<br>28 | 6.82 | 182 | 0 | 94.46 |
| T <sub>28</sub> | 98 -> 113<br>97 -> 112   | 32<br>22 | 6.84 | 181 | 0 | 94.75 |
| T <sub>29</sub> | 108 -> 117               | 54       | 6.87 | 181 | 0 | 91.46 |
| T <sub>30</sub> | 108 -> 117               | 54       | 6.87 | 180 | 0 | 91.53 |

**Table S10:** Molecular orbitals of BOD-Ph at the  $S_0$  geometry calculated in a vacuum with DLPNO-STEOM-CCSD/def2-TZVP.

|                                                                                     |                                                                                     |                                                                                      |                                                                                       |
|-------------------------------------------------------------------------------------|-------------------------------------------------------------------------------------|--------------------------------------------------------------------------------------|---------------------------------------------------------------------------------------|
| 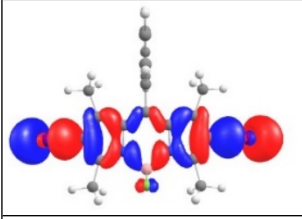   |    |    |    |
| MO 98                                                                               | MO 99                                                                               | MO 100                                                                               | MO 101                                                                                |
|    |    |    |    |
| MO 102                                                                              | MO 103                                                                              | MO 104                                                                               | MO 105                                                                                |
|   |   |   |   |
| MO 106                                                                              | MO 107                                                                              | MO 108                                                                               | MO 109                                                                                |
|  |  |  |  |
| MO 110                                                                              | MO 111                                                                              | MO 112                                                                               | MO 113                                                                                |
|  |  |  |  |
| MO 114                                                                              | MO 115                                                                              | MO 116                                                                               | MO 117                                                                                |
|  |  |                                                                                      |                                                                                       |
| MO 118                                                                              | MO 119                                                                              |                                                                                      |                                                                                       |

**Table S11:** Singlet transition energies of BOD-Ph at the  $S_0$  geometry calculated in a vacuum with different methods. All values are in eV.

| State                                             | B3LYP | TDA B3LYP | TDA MN15 | TDA SOS-PBE-QIDH | TDA SOS- $\omega$ PBEP86 <sup>a</sup> | DLPNO-STEOM-CCSD |
|---------------------------------------------------|-------|-----------|----------|------------------|---------------------------------------|------------------|
| $\pi_{\text{BOD}} \rightarrow \pi_{\text{BOD}}^*$ | 2.69  | 2.88      | 3.02     | 2.73             | 2.65 (2.58)                           | 2.09             |
|                                                   | 3.15  | 3.23      | 3.64     | 3.49             | 3.54 (3.48)                           | 3.41             |
|                                                   | 3.25  | 3.55      | 3.66     | 3.52             | 3.65 (3.61)                           | 3.48             |
| $\pi_{\text{BOD}} \rightarrow \sigma_1^*$         | 4.17  | 4.20      | 4.44     | 4.80             | 4.85 (4.63)                           | 4.49             |
|                                                   | 4.30  | 4.32      | 4.50     | 4.89             | 4.89 (4.69)                           | 4.56             |
|                                                   | 4.81  | 4.84      | 5.25     | 5.62             | 5.86 (5.58)                           | 5.43             |
|                                                   | 4.83  | 4.85      | 5.32     | 5.76             | 6.01 (5.73)                           | 5.55             |
| $\pi_{\text{BOD}} \rightarrow \pi_{\text{Ph}}^*$  | 4.15  | 4.16      | 4.69     | 4.91             | 5.19 (5.03)                           | 4.93             |
|                                                   | 4.25  | 4.26      | 4.91     | 5.21             | 5.43 (5.16)                           | 5.08             |
| $\pi_{\text{Ph}} \rightarrow \pi_{\text{BOD}}^*$  | 3.82  | 3.82      | 4.15     | 4.49             | 4.60 (4.50)                           | 4.34             |
|                                                   | 4.00  | 4.01      | 4.57     | 4.77             | 4.98 (4.87)                           | 4.84             |

<sup>a</sup> Values given in brackets for SOS- $\omega$ PBEP86 were calculated with the def2-TZVP basis set.

**Table S12:** Triplet transition energies of BOD-Ph at the  $S_0$  geometry calculated in a vacuum with different methods. All values are in eV.

| State                                             | B3LYP | TDA B3LYP | TDA MN15 | TDA SOS-PBE-QIDH | TDA SOS- $\omega$ PBEP86 <sup>a</sup> | DLPNO-STEOM-CCSD |
|---------------------------------------------------|-------|-----------|----------|------------------|---------------------------------------|------------------|
| $\pi_{\text{BOD}} \rightarrow \pi_{\text{BOD}}^*$ | 1.50  | 1.62      | 1.59     | 1.77             | 1.69 (1.65)                           | 1.38             |
|                                                   | 2.43  | 2.51      | 2.77     | 2.89             | 2.93 (2.90)                           | 2.56             |
|                                                   | 2.57  | 2.64      | 2.93     | 3.12             | 3.18 (3.17)                           | 2.74             |
|                                                   | 3.23  | 3.36      | 3.51     | 3.67             | 3.63 (3.60)                           | 3.27             |
| $\pi_{\text{BOD}} \rightarrow \sigma_1^*$         | 3.79  | 3.82      | 3.91     | 4.28             | 4.27 (4.15)                           | 4.02             |
|                                                   | 3.86  | 3.89      | 3.95     | 4.32             | 4.29 (4.19)                           | 4.07             |
|                                                   | 4.60  | 4.59      | 5.10     | 5.60             | 5.86 (5.62)                           | 5.32             |
|                                                   | 4.58  | 4.65      | 5.21     | 5.74             | 6.32 (5.79)                           | 5.47             |
| $\pi_{\text{BOD}} \rightarrow \pi_{\text{Ph}}^*$  | 4.13  | 4.14      | 4.65     | 4.98             | 5.16 (5.01)                           | 4.88             |
|                                                   | 4.19  | 4.20      | 4.69     | 5.62             | 5.78 (5.45)                           | 5.31             |
| $\pi_{\text{Ph}} \rightarrow \pi_{\text{BOD}}^*$  | 3.80  | 3.80      | 4.13     | 4.46             | 4.58 (4.48)                           | 4.33             |
|                                                   | 3.98  | 3.98      | 4.55     | 4.80             | 4.96 (4.86)                           | 4.80             |

<sup>a</sup> Values given in brackets for SOS- $\omega$ PBEP86 were calculated with the def2-TZVP basis set.

**Table S13:** Vertical transition energies of BOD-Ph for the selected excited states calculated with MN15 in a vacuum at the  $S_0$  geometry, optimized with B3LYP and MN15. All values are in eV.

| State                                             | B3LYP    |          | MN15     |          |
|---------------------------------------------------|----------|----------|----------|----------|
|                                                   | Singlets | Triplets | Singlets | Triplets |
| $\pi_{\text{BOD}} \rightarrow \pi_{\text{BOD}}^*$ | 3.02     | 1.59     | 3.02     | 1.66     |
|                                                   | 3.64     | 2.77     | 3.64     | 2.81     |
|                                                   | 3.66     | 2.94     | 3.68     | 2.96     |
|                                                   | -        | 3.51     | -        | 3.52     |
| $\pi_{\text{BOD}} \rightarrow \sigma_1^*$         | 4.44     | 3.91     | 4.54     | 4.08     |
|                                                   | 4.50     | 3.95     | 4.60     | 4.11     |
|                                                   | 5.25     | 5.10     | 5.38     | 5.24     |
|                                                   | 5.32     | 5.21     | 5.44     | 5.34     |
| $\pi_{\text{BOD}} \rightarrow \pi_{\text{Ph}}^*$  | 4.69     | 4.65     | 4.76     | 4.71     |
|                                                   | 4.91     | 4.69     | 4.93     | 4.75     |
| $\pi_{\text{Ph}} \rightarrow \pi_{\text{BOD}}^*$  | 4.15     | 4.13     | 4.14     | 4.01     |
|                                                   | 4.57     | 4.55     | 4.57     | 4.47     |

**Table S14:** Singlet transition energies at the  $S_0$  geometry calculated with MN15 in a vacuum and in DCM. All values are in eV.

| State                                             | BOD-Ph(Vac) | BOD-Ph(DCM) | BOD-PhOH(Vac) | BOD-PhOH(DCM) | BOD-PhNO <sub>2</sub> (Vac) | BOD-PhNO <sub>2</sub> (DCM) |
|---------------------------------------------------|-------------|-------------|---------------|---------------|-----------------------------|-----------------------------|
| $\pi_{\text{BOD}} \rightarrow \pi_{\text{BOD}}^*$ | 3.02        | 2.90        | 3.02          | 2.90          | 2.96                        | 2.86                        |
|                                                   | 3.64        | 3.64        | 3.66          | 3.66          | 3.56                        | 3.58                        |
|                                                   | 3.68        | 3.62        | 3.68          | 3.63          | 3.66                        | 3.60                        |
| $\pi_{\text{BOD}} \rightarrow \sigma_1^*$         | 4.54        | 4.59        | 4.54          | 4.59          | 4.58                        | 4.67                        |
|                                                   | 4.60        | 4.65        | 4.60          | 4.65          | 4.63                        | 4.67                        |
|                                                   | 5.38        | 5.42        | 5.37          | 5.41          | 5.43                        | 5.51                        |
|                                                   | 5.44        | 5.49        | 5.44          | 5.49          | 5.48                        | 5.51                        |
| $\pi_{\text{BOD}} \rightarrow \pi_{\text{Ph}}^*$  | 4.76        | 5.05        | 5.11          | 5.44          | 3.45                        | 3.51                        |
|                                                   | 4.93        | 5.22        | 4.81          | 5.16          | 4.51                        | 4.59                        |
| $\pi_{\text{Ph}} \rightarrow \pi_{\text{BOD}}^*$  | 4.14        | 3.90        | 3.57          | 3.29          | 4.85                        | 4.41                        |
|                                                   | 4.57        | 4.28        | 4.67          | 4.36          | 5.15                        | 4.66                        |

**Table S15:** Triplet transition energies at the  $S_0$  geometry calculated with MN15 in a vacuum and in DCM. All values are in eV.

| State                                             | BOD-Ph(Vac) | BOD-Ph(DCM) | BOD-PhOH(Vac) | BOD-PhOH(DCM) | BOD-PhNO <sub>2</sub> (Vac) | BOD-PhNO <sub>2</sub> (DCM) |
|---------------------------------------------------|-------------|-------------|---------------|---------------|-----------------------------|-----------------------------|
| $\pi_{\text{BOD}} \rightarrow \pi_{\text{BOD}}^*$ | 1.66        | 1.69        | 1.67          | 1.71          | 1.61                        | 1.65                        |
|                                                   | 2.81        | 2.83        | 2.81          | 2.84          | 2.76                        | 2.79                        |
|                                                   | 2.96        | 3.00        | 2.97          | 3.00          | 2.90                        | 2.95                        |
|                                                   | 3.52        | 3.50        | 3.70          | 3.65          | 3.54                        | 3.54                        |
| $\pi_{\text{BOD}} \rightarrow \sigma_1^*$         | 4.08        | 4.14        | 4.11          | 4.13          | 4.09                        | 4.15                        |
|                                                   | 4.11        | 4.17        | 4.17          | 4.17          | 4.13                        | 4.18                        |
|                                                   | 5.24        | 5.29        | 5.24          | 5.28          | 5.29                        | 5.32                        |
|                                                   | 5.34        | 5.40        | 5.10          | 5.30          | 5.35                        | 5.33                        |
| $\pi_{\text{BOD}} \rightarrow \pi_{\text{Ph}}^*$  | 4.71        | 5.01        | 5.06          | 5.25          | 3.42                        | 3.50                        |
|                                                   | 4.75        | 4.86        | 5.10          | 5.28          | 4.46                        | 4.61                        |
| $\pi_{\text{Ph}} \rightarrow \pi_{\text{BOD}}^*$  | 4.01        | 3.87        | 3.34          | 3.13          | 4.74                        | 4.70                        |
|                                                   | 4.47        | 4.20        | 4.61          | 4.26          | 5.02                        | 4.75                        |



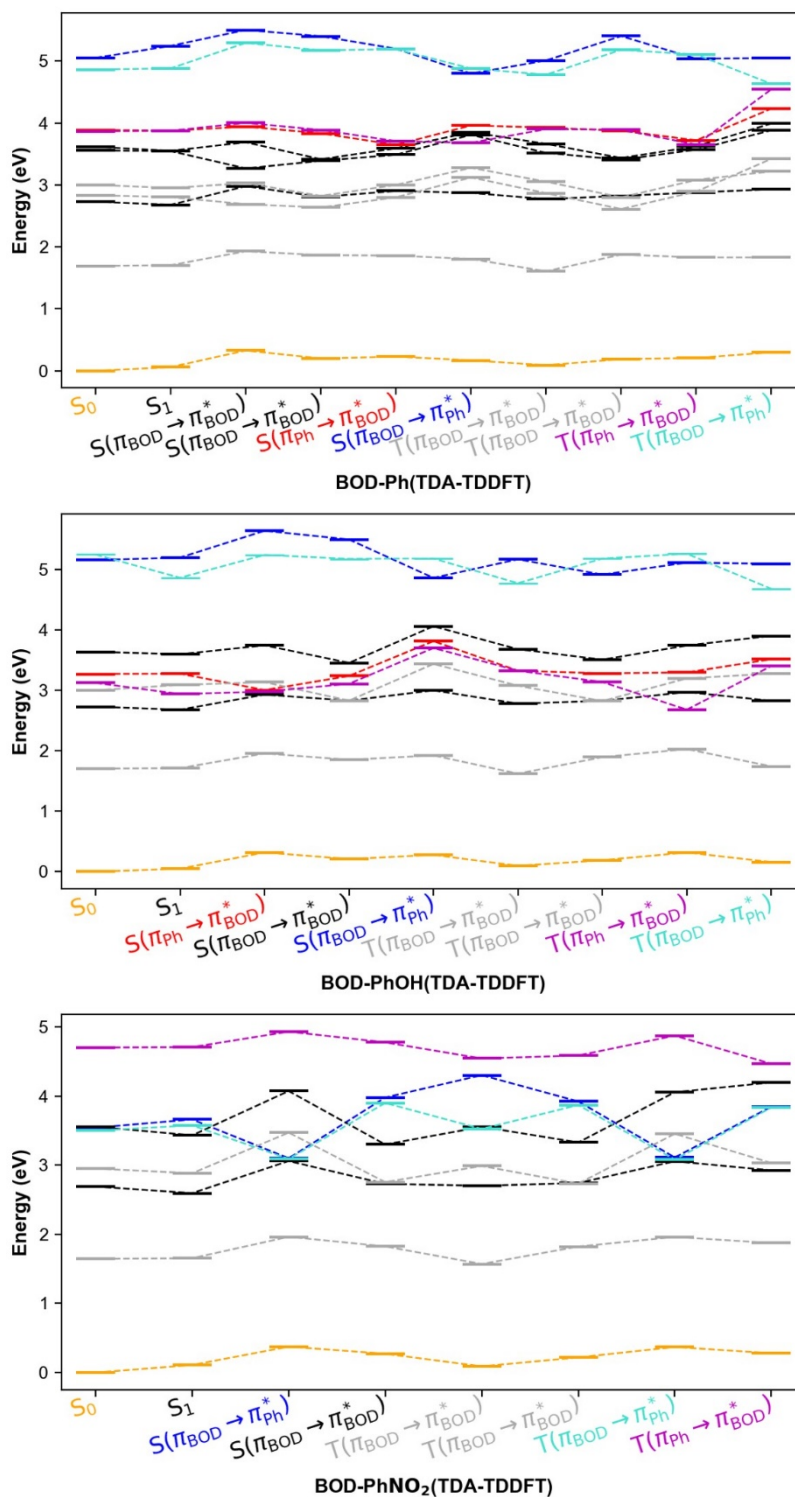

**Figure S1:** Energy diagrams for selected singlet and triplet states of BOD-Ph, BOD-PhOH and BOD-PhNO<sub>2</sub>. The calculations were performed at different geometries in DCM with TDA-TDDFT (MN15).

**Table S16:** Energies (eV) for selected BOD-Ph states at their optimized geometries, calculated with TDA-TDDFT (MN15) in DCM.

| State                                                                | Geometry       |                                                                         |                                                           |                                                           |                                                           |                                                           |
|----------------------------------------------------------------------|----------------|-------------------------------------------------------------------------|-----------------------------------------------------------|-----------------------------------------------------------|-----------------------------------------------------------|-----------------------------------------------------------|
|                                                                      | S <sub>0</sub> | S <sub>1</sub><br>( $\pi_{\text{BOD}} \rightarrow \pi_{\text{BOD}}^*$ ) | S<br>( $\pi_{\text{Ph}} \rightarrow \pi_{\text{BOD}}^*$ ) | S<br>( $\pi_{\text{BOD}} \rightarrow \pi_{\text{Ph}}^*$ ) | T<br>( $\pi_{\text{Ph}} \rightarrow \pi_{\text{BOD}}^*$ ) | T<br>( $\pi_{\text{BOD}} \rightarrow \pi_{\text{Ph}}^*$ ) |
| S <sub>1</sub> ( $\pi_{\text{BOD}} \rightarrow \pi_{\text{BOD}}^*$ ) | 2.73           | 2.68                                                                    | 2.90                                                      | 2.87                                                      | 2.88                                                      | 2.93                                                      |
| S( $\pi_{\text{Ph}} \rightarrow \pi_{\text{BOD}}^*$ )                | 3.89           | 3.88                                                                    | 3.65                                                      | 3.96                                                      | 3.72                                                      | 4.23                                                      |
| S( $\pi_{\text{BOD}} \rightarrow \pi_{\text{Ph}}^*$ )                | 5.05           | 5.24                                                                    | 5.20                                                      | 4.80                                                      | 5.04                                                      | 5.05                                                      |
| T( $\pi_{\text{Ph}} \rightarrow \pi_{\text{BOD}}^*$ )                | 3.87           | 3.87                                                                    | 3.71                                                      | 3.78                                                      | 3.65                                                      | 4.54                                                      |
| T( $\pi_{\text{BOD}} \rightarrow \pi_{\text{Ph}}^*$ )                | 4.86           | 4.88                                                                    | 5.19                                                      | 4.88                                                      | 5.10                                                      | 4.63                                                      |

**Table S17:** Energies (eV) for selected BOD-PhNO<sub>2</sub> states at their optimized geometries, calculated with TDA-TDDFT (MN15) in DCM.

| State                                                                | Geometry       |                                                                         |                                                           |                                                           |                                                           |                                                           |
|----------------------------------------------------------------------|----------------|-------------------------------------------------------------------------|-----------------------------------------------------------|-----------------------------------------------------------|-----------------------------------------------------------|-----------------------------------------------------------|
|                                                                      | S <sub>0</sub> | S <sub>1</sub><br>( $\pi_{\text{BOD}} \rightarrow \pi_{\text{BOD}}^*$ ) | S<br>( $\pi_{\text{BOD}} \rightarrow \pi_{\text{Ph}}^*$ ) | S<br>( $\pi_{\text{Ph}} \rightarrow \pi_{\text{BOD}}^*$ ) | T<br>( $\pi_{\text{BOD}} \rightarrow \pi_{\text{Ph}}^*$ ) | T<br>( $\pi_{\text{Ph}} \rightarrow \pi_{\text{BOD}}^*$ ) |
| S <sub>1</sub> ( $\pi_{\text{BOD}} \rightarrow \pi_{\text{BOD}}^*$ ) | 2.69           | 2.59                                                                    | 3.06                                                      | -                                                         | 3.06                                                      | 2.92                                                      |
| S( $\pi_{\text{BOD}} \rightarrow \pi_{\text{Ph}}^*$ )                | 3.54           | 3.66                                                                    | 3.10                                                      | -                                                         | 3.11                                                      | 3.84                                                      |
| S( $\pi_{\text{Ph}} \rightarrow \pi_{\text{BOD}}^*$ )                | 4.40           | 4.21                                                                    | 4.86                                                      | -                                                         | 4.80                                                      | 4.15                                                      |
| T( $\pi_{\text{BOD}} \rightarrow \pi_{\text{Ph}}^*$ )                | 3.50           | 3.58                                                                    | 3.09                                                      | -                                                         | 3.08                                                      | 3.83                                                      |
| T( $\pi_{\text{Ph}} \rightarrow \pi_{\text{BOD}}^*$ )                | 4.70           | 4.71                                                                    | 4.93                                                      | -                                                         | 4.87                                                      | 4.47                                                      |

**Table S18:** Energies (eV) for selected BOD-PhOH states at their optimized geometries, calculated with TDA-TDDFT (MN15) in DCM.

| State                                                                | Geometry       |                                                                         |                                                           |                                                           |                                                           |                                                           |
|----------------------------------------------------------------------|----------------|-------------------------------------------------------------------------|-----------------------------------------------------------|-----------------------------------------------------------|-----------------------------------------------------------|-----------------------------------------------------------|
|                                                                      | S <sub>0</sub> | S <sub>1</sub><br>( $\pi_{\text{BOD}} \rightarrow \pi_{\text{BOD}}^*$ ) | S<br>( $\pi_{\text{Ph}} \rightarrow \pi_{\text{BOD}}^*$ ) | S<br>( $\pi_{\text{BOD}} \rightarrow \pi_{\text{Ph}}^*$ ) | T<br>( $\pi_{\text{Ph}} \rightarrow \pi_{\text{BOD}}^*$ ) | T<br>( $\pi_{\text{BOD}} \rightarrow \pi_{\text{Ph}}^*$ ) |
| S <sub>1</sub> ( $\pi_{\text{BOD}} \rightarrow \pi_{\text{BOD}}^*$ ) | 2.73           | 2.68                                                                    | 2.93                                                      | 3.00                                                      | 2.97                                                      | 2.83                                                      |
| S( $\pi_{\text{Ph}} \rightarrow \pi_{\text{BOD}}^*$ )                | 3.27           | 3.28                                                                    | 3.01                                                      | 3.82                                                      | 3.30                                                      | 3.52                                                      |
| S( $\pi_{\text{BOD}} \rightarrow \pi_{\text{Ph}}^*$ )                | 5.16           | 5.20                                                                    | 5.64                                                      | 4.86                                                      | 5.12                                                      | 5.10                                                      |
| T( $\pi_{\text{Ph}} \rightarrow \pi_{\text{BOD}}^*$ )                | 3.13           | 2.94                                                                    | 2.98                                                      | 3.70                                                      | 2.68                                                      | 3.41                                                      |
| T( $\pi_{\text{BOD}} \rightarrow \pi_{\text{Ph}}^*$ )                | 5.25           | 4.87                                                                    | 5.25                                                      | 5.19                                                      | 5.23                                                      | 4.68                                                      |

**Table S19:** Energies (eV) for selected BOD-PhOH states at their optimized TDA-TDDFT geometries, calculated with DLPNO-STEOM-CCSD in DCM.

| State                                                                | Geometry       |                                                                         |                                                           |                                                           |                                                           |                                                           |
|----------------------------------------------------------------------|----------------|-------------------------------------------------------------------------|-----------------------------------------------------------|-----------------------------------------------------------|-----------------------------------------------------------|-----------------------------------------------------------|
|                                                                      | S <sub>0</sub> | S <sub>1</sub><br>( $\pi_{\text{BOD}} \rightarrow \pi_{\text{BOD}}^*$ ) | S<br>( $\pi_{\text{Ph}} \rightarrow \pi_{\text{BOD}}^*$ ) | S<br>( $\pi_{\text{BOD}} \rightarrow \pi_{\text{Ph}}^*$ ) | T<br>( $\pi_{\text{Ph}} \rightarrow \pi_{\text{BOD}}^*$ ) | T<br>( $\pi_{\text{BOD}} \rightarrow \pi_{\text{Ph}}^*$ ) |
| S <sub>1</sub> ( $\pi_{\text{BOD}} \rightarrow \pi_{\text{BOD}}^*$ ) | 2.12           | 2.07                                                                    | 2.45                                                      | 2.46                                                      | 2.46                                                      | 2.31                                                      |
| S( $\pi_{\text{Ph}} \rightarrow \pi_{\text{BOD}}^*$ )                | 2.96           | 2.98                                                                    | 2.72                                                      | 3.52                                                      | 2.96                                                      | 3.20                                                      |
| S( $\pi_{\text{BOD}} \rightarrow \pi_{\text{Ph}}^*$ )                | 5.01           | 5.11                                                                    | 5.84                                                      | 4.96                                                      | 5.66                                                      | 4.99                                                      |
| T( $\pi_{\text{Ph}} \rightarrow \pi_{\text{BOD}}^*$ )                | 3.01           | 2.85                                                                    | 2.74                                                      | 3.61                                                      | 2.50                                                      | 3.65                                                      |
| T( $\pi_{\text{BOD}} \rightarrow \pi_{\text{Ph}}^*$ )                | -              | -                                                                       | -                                                         | -                                                         | -                                                         | -                                                         |

Cartesian coordinates for the  $S_0$  state of BOD-Ph (MN15/def2-SVP in DCM)

|    |          |          |          |
|----|----------|----------|----------|
| 6  | 0.61346  | -0.48889 | -0.30262 |
| 6  | 1.209974 | -1.66303 | -2.10151 |
| 6  | 1.286471 | -1.65171 | 0.188061 |
| 7  | 0.601564 | -0.5387  | -1.69405 |
| 6  | 0.023367 | 0.590668 | 0.376523 |
| 6  | -0.57973 | 1.642721 | -0.333   |
| 5  | 0.063678 | 0.569219 | -2.64097 |
| 7  | -0.57782 | 1.64794  | -1.72531 |
| 6  | -1.29253 | 2.795703 | 0.124836 |
| 6  | -1.2346  | 2.731972 | -2.16434 |
| 9  | -0.88861 | 0.045172 | -3.50594 |
| 9  | 1.112728 | 1.122829 | -3.3721  |
| 6  | 0.939353 | 1.421262 | 2.549752 |
| 6  | 0.024873 | 0.613715 | 1.862514 |
| 6  | -0.8886  | -0.17169 | 2.57648  |
| 6  | 0.942949 | 1.437079 | 3.945505 |
| 1  | 1.661177 | 2.062848 | 4.479204 |
| 6  | 0.027194 | 0.657656 | 4.657334 |
| 6  | -0.88989 | -0.14368 | 3.971903 |
| 1  | -1.6072  | -0.75232 | 4.526258 |
| 1  | 1.647567 | 2.033936 | 1.986133 |
| 1  | -1.59791 | -0.80156 | 2.033459 |
| 1  | 0.028149 | 0.674802 | 5.749125 |
| 6  | 1.577903 | -2.05004 | 1.598297 |
| 1  | 1.919553 | -1.20109 | 2.2056   |
| 1  | 2.35274  | -2.8289  | 1.612147 |
| 1  | 0.683435 | -2.45858 | 2.093073 |
| 6  | 1.347893 | -2.02245 | -3.53815 |
| 1  | 0.372436 | -2.3187  | -3.95275 |
| 1  | 2.052426 | -2.85336 | -3.66483 |
| 1  | 1.69589  | -1.15277 | -4.11229 |
| 6  | -1.58403 | 3.229885 | 1.524327 |
| 1  | -2.36009 | 4.007426 | 1.519564 |
| 1  | -0.68918 | 3.649854 | 2.008358 |
| 1  | -1.92439 | 2.395844 | 2.153037 |
| 6  | -1.42863 | 3.020102 | -3.6105  |
| 1  | -0.50099 | 2.81973  | -4.16338 |
| 1  | -1.73052 | 4.063932 | -3.76076 |
| 1  | -2.2085  | 2.365334 | -4.02856 |
| 6  | 1.640798 | -2.37281 | -0.95524 |
| 53 | 2.635947 | -4.20139 | -1.007   |
| 6  | -1.68704 | 3.461226 | -1.03841 |
| 53 | -2.77428 | 5.234034 | -1.14717 |

Cartesian coordinates for the S<sub>0</sub> state of BOD-PhOH (MN15/def2-SVP in DCM)

|    |          |          |          |
|----|----------|----------|----------|
| 6  | 0.600502 | -0.48774 | -0.30406 |
| 6  | 1.160809 | -1.6888  | -2.09778 |
| 6  | 1.279844 | -1.64511 | 0.189688 |
| 7  | 0.566454 | -0.55492 | -1.69439 |
| 6  | 0.031066 | 0.606444 | 0.372157 |
| 6  | -0.5582  | 1.662997 | -0.34469 |
| 5  | 0.052086 | 0.558786 | -2.64695 |
| 7  | -0.5507  | 1.663814 | -1.73704 |
| 6  | -1.27037 | 2.819063 | 0.105873 |
| 6  | -1.19775 | 2.751314 | -2.18281 |
| 9  | -0.92295 | 0.054969 | -3.49923 |
| 9  | 1.110462 | 1.074103 | -3.39299 |
| 6  | 0.892249 | 1.509679 | 2.544794 |
| 6  | 0.037087 | 0.638982 | 1.854644 |
| 6  | -0.8144  | -0.19812 | 2.584926 |
| 6  | 0.904379 | 1.538071 | 3.93532  |
| 1  | 1.57286  | 2.205474 | 4.482046 |
| 6  | 0.042256 | 0.703902 | 4.662584 |
| 6  | -0.82123 | -0.16237 | 3.977543 |
| 1  | -1.49505 | -0.81176 | 4.542729 |
| 1  | 1.558298 | 2.1689   | 1.982078 |
| 1  | -1.48324 | -0.88259 | 2.056757 |
| 6  | 1.614686 | -2.02071 | 1.596802 |
| 1  | 1.917938 | -1.15167 | 2.195707 |
| 1  | 2.431418 | -2.75606 | 1.59938  |
| 1  | 0.75394  | -2.47875 | 2.108183 |
| 6  | 1.274246 | -2.0658  | -3.53219 |
| 1  | 0.285154 | -2.3269  | -3.93767 |
| 1  | 1.946195 | -2.9235  | -3.65678 |
| 1  | 1.650995 | -1.21485 | -4.11645 |
| 6  | -1.58611 | 3.253345 | 1.500287 |
| 1  | -2.40498 | 3.985915 | 1.484653 |
| 1  | -0.71855 | 3.732787 | 1.979137 |
| 1  | -1.87752 | 2.409372 | 2.139999 |
| 6  | -1.38565 | 3.035486 | -3.63067 |
| 1  | -0.46466 | 2.806863 | -4.18348 |
| 1  | -1.65979 | 4.086214 | -3.78672 |
| 1  | -2.184   | 2.400166 | -4.04393 |
| 6  | 1.607551 | -2.38502 | -0.9503  |
| 53 | 2.59375  | -4.21882 | -0.99124 |
| 6  | -1.65135 | 3.485812 | -1.06169 |
| 53 | -2.72755 | 5.26476  | -1.17954 |
| 8  | 0.08185  | 0.772768 | 6.007707 |
| 1  | -0.55381 | 0.15742  | 6.403111 |

Cartesian coordinates for the  $S_0$  state of BOD-PhNO<sub>2</sub> (MN15/def2-SVP in DCM)

|    |          |          |          |
|----|----------|----------|----------|
| 6  | 0.172144 | 1.211729 | -1.05985 |
| 6  | 1.306808 | 2.953018 | -1.86405 |
| 6  | -0.21928 | 1.341745 | -2.43039 |
| 7  | 1.102648 | 2.205524 | -0.7693  |
| 6  | -0.22585 | 0.302264 | -0.0667  |
| 6  | 0.304331 | 0.369526 | 1.231562 |
| 5  | 1.858189 | 2.383613 | 0.577385 |
| 7  | 1.259027 | 1.330764 | 1.55146  |
| 6  | 0.016181 | -0.39442 | 2.407492 |
| 6  | 1.589028 | 1.211759 | 2.845673 |
| 9  | 1.661375 | 3.664527 | 1.074844 |
| 9  | 3.218444 | 2.148072 | 0.395676 |
| 6  | -0.82013 | -2.05093 | -0.66664 |
| 6  | -1.23516 | -0.74101 | -0.39119 |
| 6  | -2.59668 | -0.40983 | -0.4202  |
| 6  | -1.75972 | -3.03134 | -0.97535 |
| 1  | -1.46939 | -4.05761 | -1.19788 |
| 6  | -3.10578 | -2.67537 | -0.99323 |
| 6  | -3.54647 | -1.38311 | -0.71954 |
| 1  | -4.61231 | -1.1588  | -0.74662 |
| 1  | 0.242854 | -2.29987 | -0.63997 |
| 1  | -2.91029 | 0.614013 | -0.20541 |
| 6  | -1.17573 | 0.510008 | -3.22143 |
| 1  | -1.0257  | -0.56529 | -3.05476 |
| 1  | -1.0499  | 0.716569 | -4.29296 |
| 1  | -2.22021 | 0.736942 | -2.95833 |
| 6  | 2.235859 | 4.113877 | -1.87827 |
| 1  | 1.804168 | 4.954071 | -1.31344 |
| 1  | 2.43063  | 4.442951 | -2.90614 |
| 1  | 3.18274  | 3.844617 | -1.39057 |
| 6  | -0.94182 | -1.52732 | 2.583218 |
| 1  | -1.07444 | -1.74098 | 3.652385 |
| 1  | -0.57279 | -2.4451  | 2.100763 |
| 1  | -1.92664 | -1.30741 | 2.148673 |
| 6  | 2.573857 | 2.108373 | 3.506763 |
| 1  | 3.441391 | 2.264887 | 2.851602 |
| 1  | 2.903864 | 1.684155 | 4.462913 |
| 1  | 2.123053 | 3.09451  | 3.696586 |
| 6  | 0.49718  | 2.441133 | -2.90762 |
| 53 | 0.413602 | 3.236382 | -4.82971 |
| 6  | 0.833478 | 0.149203 | 3.400202 |
| 53 | 0.950481 | -0.46153 | 5.386984 |
| 7  | -4.10441 | -3.70801 | -1.31471 |
| 8  | -5.27435 | -3.37728 | -1.3258  |
| 8  | -3.69986 | -4.83017 | -1.54997 |

Cartesian coordinates for the S<sub>1</sub> state of BOD-Ph (MN15/def2-SVP in DCM)

|    |          |          |          |
|----|----------|----------|----------|
| 6  | 0.585527 | -0.51007 | -0.29103 |
| 6  | 1.121492 | -1.69703 | -2.12124 |
| 6  | 1.27972  | -1.66137 | 0.182874 |
| 7  | 0.531241 | -0.56583 | -1.69682 |
| 6  | 0.010619 | 0.582008 | 0.41355  |
| 6  | -0.57779 | 1.646796 | -0.32132 |
| 5  | 0.015085 | 0.541007 | -2.64138 |
| 7  | -0.53744 | 1.656739 | -1.72852 |
| 6  | -1.28316 | 2.803849 | 0.121195 |
| 6  | -1.14999 | 2.763403 | -2.18434 |
| 9  | -0.99434 | 0.048138 | -3.46984 |
| 9  | 1.057132 | 1.026322 | -3.43549 |
| 6  | 0.824021 | 1.525744 | 2.584312 |
| 6  | 0.017556 | 0.608007 | 1.893828 |
| 6  | -0.7842  | -0.28304 | 2.623807 |
| 6  | 0.83122  | 1.548878 | 3.979434 |
| 1  | 1.46754  | 2.262252 | 4.507645 |
| 6  | 0.026722 | 0.661032 | 4.699463 |
| 6  | -0.78227 | -0.25346 | 4.018742 |
| 1  | -1.41516 | -0.94615 | 4.577705 |
| 1  | 1.449314 | 2.219767 | 2.016291 |
| 1  | -1.41374 | -0.99739 | 2.086481 |
| 1  | 0.030185 | 0.681749 | 5.791307 |
| 6  | 1.652136 | -2.03366 | 1.581384 |
| 1  | 1.96175  | -1.15991 | 2.170943 |
| 1  | 2.483098 | -2.75362 | 1.564992 |
| 1  | 0.817255 | -2.50534 | 2.124646 |
| 6  | 1.240807 | -2.04717 | -3.55698 |
| 1  | 0.245981 | -2.0739  | -4.02881 |
| 1  | 1.734887 | -3.01747 | -3.68627 |
| 1  | 1.813822 | -1.27107 | -4.08984 |
| 6  | -1.64468 | 3.218768 | 1.510556 |
| 1  | -2.48082 | 3.932148 | 1.479303 |
| 1  | -0.80755 | 3.713231 | 2.029495 |
| 1  | -1.94206 | 2.362681 | 2.131608 |
| 6  | -1.29549 | 3.060392 | -3.62964 |
| 1  | -0.32209 | 2.970519 | -4.13583 |
| 1  | -1.70335 | 4.066422 | -3.78537 |
| 1  | -1.9624  | 2.323375 | -4.10662 |
| 6  | 1.586943 | -2.39809 | -0.976   |
| 53 | 2.581198 | -4.20765 | -1.04422 |
| 6  | -1.61436 | 3.495768 | -1.05842 |
| 53 | -2.63734 | 5.286447 | -1.17897 |

Cartesian coordinates for the S<sub>1</sub> state of BOD-PhOH (MN15/def2-SVP in DCM)

|    |          |          |          |
|----|----------|----------|----------|
| 6  | 0.582372 | -0.49987 | -0.29391 |
| 6  | 1.102546 | -1.70591 | -2.1166  |
| 6  | 1.279734 | -1.64724 | 0.185561 |
| 7  | 0.517156 | -0.56952 | -1.69854 |
| 6  | 0.013977 | 0.599362 | 0.406232 |
| 6  | -0.57265 | 1.660596 | -0.33668 |
| 5  | -0.00069 | 0.53046  | -2.64969 |
| 7  | -0.53497 | 1.660549 | -1.74402 |
| 6  | -1.27261 | 2.823796 | 0.09867  |
| 6  | -1.14247 | 2.767472 | -2.20671 |
| 9  | -1.0228  | 0.036123 | -3.46243 |
| 9  | 1.036364 | 0.998523 | -3.46072 |
| 6  | 0.817213 | 1.56533  | 2.577104 |
| 6  | 0.024757 | 0.635024 | 1.884475 |
| 6  | -0.75766 | -0.25869 | 2.629789 |
| 6  | 0.832956 | 1.601345 | 3.967513 |
| 1  | 1.453073 | 2.318218 | 4.50898  |
| 6  | 0.042123 | 0.705652 | 4.701904 |
| 6  | -0.75586 | -0.22509 | 4.02269  |
| 1  | -1.376   | -0.92227 | 4.592965 |
| 1  | 1.433829 | 2.268034 | 2.010163 |
| 1  | -1.38163 | -0.98895 | 2.107607 |
| 6  | 1.666997 | -2.00456 | 1.58405  |
| 1  | 1.975076 | -1.12322 | 2.163021 |
| 1  | 2.502723 | -2.71909 | 1.566577 |
| 1  | 0.840738 | -2.47749 | 2.139416 |
| 6  | 1.210969 | -2.06977 | -3.54984 |
| 1  | 0.214135 | -2.08375 | -4.01782 |
| 1  | 1.688902 | -3.04898 | -3.67272 |
| 1  | 1.794919 | -1.30795 | -4.09152 |
| 6  | -1.63362 | 3.248844 | 1.485189 |
| 1  | -2.47114 | 3.96051  | 1.449048 |
| 1  | -0.79769 | 3.74945  | 2.000212 |
| 1  | -1.92813 | 2.39674  | 2.113026 |
| 6  | -1.28848 | 3.055273 | -3.65383 |
| 1  | -0.31419 | 2.968748 | -4.15902 |
| 1  | -1.70246 | 4.057797 | -3.81581 |
| 1  | -1.9499  | 2.310879 | -4.12695 |
| 6  | 1.57642  | -2.39583 | -0.96839 |
| 53 | 2.568781 | -4.20737 | -1.02673 |
| 6  | -1.6016  | 3.509481 | -1.08524 |
| 53 | -2.61609 | 5.304715 | -1.21617 |
| 8  | 0.083863 | 0.779585 | 6.048761 |
| 1  | -0.50076 | 0.116921 | 6.445888 |



Cartesian coordinates for the S<sub>1</sub> state of BOD-PhNO<sub>2</sub> (MN15/def2-SVP in DCM)

|    |          |          |          |
|----|----------|----------|----------|
| 6  | 0.100666 | 1.252768 | -1.04308 |
| 6  | 1.153832 | 3.092405 | -1.77671 |
| 6  | -0.23485 | 1.366578 | -2.42397 |
| 7  | 0.969745 | 2.305584 | -0.70446 |
| 6  | -0.27552 | 0.284252 | -0.07061 |
| 6  | 0.32348  | 0.332345 | 1.219393 |
| 5  | 1.788547 | 2.43596  | 0.601477 |
| 7  | 1.348699 | 1.254254 | 1.497586 |
| 6  | 0.051047 | -0.41518 | 2.402345 |
| 6  | 1.762179 | 1.090408 | 2.764423 |
| 9  | 1.514761 | 3.645244 | 1.237993 |
| 9  | 3.151471 | 2.36205  | 0.319595 |
| 6  | -0.92142 | -2.11578 | -0.33496 |
| 6  | -1.26822 | -0.75064 | -0.39386 |
| 6  | -2.57923 | -0.39071 | -0.76671 |
| 6  | -1.85182 | -3.09786 | -0.64658 |
| 1  | -1.59925 | -4.15746 | -0.62395 |
| 6  | -3.14408 | -2.70624 | -1.00466 |
| 6  | -3.52375 | -1.36325 | -1.06559 |
| 1  | -4.54673 | -1.10681 | -1.33907 |
| 1  | 0.09683  | -2.39679 | -0.05625 |
| 1  | -2.85321 | 0.666215 | -0.80308 |
| 6  | -1.01989 | 0.438496 | -3.29193 |
| 1  | -0.86654 | -0.61139 | -3.00797 |
| 1  | -0.70908 | 0.562812 | -4.33936 |
| 1  | -2.10414 | 0.630213 | -3.24675 |
| 6  | 2.049775 | 4.273161 | -1.76192 |
| 1  | 1.859948 | 4.88364  | -0.86683 |
| 1  | 1.914796 | 4.8802   | -2.66526 |
| 1  | 3.102415 | 3.949754 | -1.70319 |
| 6  | -1.02017 | -1.42217 | 2.665873 |
| 1  | -1.2404  | -1.45199 | 3.742808 |
| 1  | -0.72915 | -2.4408  | 2.362443 |
| 1  | -1.94756 | -1.17921 | 2.129838 |
| 6  | 2.810511 | 1.936474 | 3.382719 |
| 1  | 3.673489 | 2.027729 | 2.706822 |
| 1  | 3.131279 | 1.523111 | 4.346552 |
| 1  | 2.427922 | 2.958381 | 3.542169 |
| 6  | 0.405919 | 2.541286 | -2.85423 |
| 53 | 0.341592 | 3.341933 | -4.75476 |
| 6  | 0.983866 | 0.050539 | 3.345001 |
| 53 | 1.186328 | -0.60606 | 5.290524 |
| 7  | -4.12942 | -3.73347 | -1.32549 |
| 8  | -5.24959 | -3.37043 | -1.64511 |
| 8  | -3.78064 | -4.90069 | -1.25704 |

Cartesian coordinates for the  $S(\pi_{\text{Ph}} \rightarrow \pi_{\text{BOD}}^*)$  state of BOD-Ph (MN15/def2-SVP in DCM)

|    |          |          |          |
|----|----------|----------|----------|
| 6  | -1.23716 | 0.23662  | 0.014135 |
| 6  | -2.53848 | -1.59094 | 0.001025 |
| 6  | -2.57365 | 0.704268 | 0.020006 |
| 7  | -1.24429 | -1.14206 | 0.009671 |
| 6  | -0.00022 | 0.952038 | 0.029785 |
| 6  | 1.235775 | 0.235996 | 0.029245 |
| 5  | -0.00123 | -2.06057 | 0.061458 |
| 7  | 1.242341 | -1.14297 | 0.03176  |
| 6  | 2.572333 | 0.703069 | -0.00178 |
| 6  | 2.535784 | -1.5921  | 0.011573 |
| 9  | 0.011012 | -2.92659 | -1.03543 |
| 9  | -0.0156  | -2.8231  | 1.237548 |
| 6  | 0.297877 | 3.148311 | 1.220055 |
| 6  | 0.000329 | 2.411855 | 0.022414 |
| 6  | -0.29257 | 3.134074 | -1.18568 |
| 6  | 0.299239 | 4.525565 | 1.205364 |
| 1  | 0.519755 | 5.091795 | 2.110646 |
| 6  | 0.013943 | 5.209782 | 0.001659 |
| 6  | -0.27909 | 4.511302 | -1.19167 |
| 1  | -0.49372 | 5.066403 | -2.10523 |
| 1  | 0.508098 | 2.587672 | 2.132522 |
| 1  | -0.5087  | 2.561832 | -2.08957 |
| 1  | 0.019552 | 6.301145 | -0.00618 |
| 6  | -3.06924 | 2.112087 | 0.02945  |
| 1  | -2.59579 | 2.736128 | 0.80138  |
| 1  | -4.15362 | 2.127733 | 0.217477 |
| 1  | -2.91687 | 2.611633 | -0.94469 |
| 6  | -2.8736  | -3.04203 | -0.027   |
| 1  | -2.56719 | -3.50047 | -0.97972 |
| 1  | -3.95375 | -3.18895 | 0.102535 |
| 1  | -2.33819 | -3.5745  | 0.772252 |
| 6  | 3.067815 | 2.111106 | -0.01182 |
| 1  | 4.152121 | 2.126941 | -0.1995  |
| 1  | 2.91374  | 2.61069  | 0.961781 |
| 1  | 2.594328 | 2.735131 | -0.78406 |
| 6  | 2.8702   | -3.04364 | -0.00378 |
| 1  | 2.318202 | -3.57182 | 0.787045 |
| 1  | 3.947125 | -3.19159 | 0.148767 |
| 1  | 2.582263 | -3.50583 | -0.96045 |
| 6  | -3.36756 | -0.47335 | -0.00253 |
| 53 | -5.45066 | -0.53177 | -0.01042 |
| 6  | 3.365556 | -0.47472 | -0.00049 |
| 53 | 5.448203 | -0.53718 | -0.05262 |

Cartesian coordinates for the  $S(\pi_{\text{Ph}} \rightarrow \pi_{\text{BOD}}^*)$  state of BOD-PhOH (MN15/def2-SVP in DCM)

|    |          |          |          |
|----|----------|----------|----------|
| 6  | -1.23097 | 0.040304 | -0.03521 |
| 6  | -2.51985 | -1.78558 | 0.041652 |
| 6  | -2.56329 | 0.508766 | -0.06435 |
| 7  | -1.22586 | -1.34433 | 0.028261 |
| 6  | -0.00056 | 0.757238 | -0.05393 |
| 6  | 1.242753 | 0.04717  | -0.02703 |
| 5  | 0.012031 | -2.26101 | 0.090543 |
| 7  | 1.254569 | -1.34062 | 0.006662 |
| 6  | 2.568539 | 0.523376 | -0.04892 |
| 6  | 2.54721  | -1.77741 | -0.0011  |
| 9  | 0.012069 | -3.16862 | -0.97786 |
| 9  | 0.034505 | -2.99225 | 1.287911 |
| 6  | 0.027293 | 2.894192 | 1.263807 |
| 6  | -0.00748 | 2.216869 | -0.00182 |
| 6  | -0.0687  | 3.004007 | -1.20664 |
| 6  | 0.003248 | 4.258511 | 1.329936 |
| 1  | 0.02735  | 4.801241 | 2.274729 |
| 6  | -0.05676 | 5.016512 | 0.115459 |
| 6  | -0.09234 | 4.370332 | -1.15749 |
| 1  | -0.14378 | 4.973653 | -2.06574 |
| 1  | 0.075649 | 2.292971 | 2.172518 |
| 1  | -0.09932 | 2.481865 | -2.16378 |
| 6  | -3.0564  | 1.920466 | -0.16479 |
| 1  | -2.67774 | 2.568488 | 0.641972 |
| 1  | -4.15343 | 1.939634 | -0.08807 |
| 1  | -2.79412 | 2.395812 | -1.1231  |
| 6  | -2.85803 | -3.23628 | 0.099624 |
| 1  | -2.47656 | -3.76288 | -0.78729 |
| 1  | -3.94513 | -3.37979 | 0.158492 |
| 1  | -2.38566 | -3.70791 | 0.973681 |
| 6  | 3.053684 | 1.937671 | -0.09991 |
| 1  | 4.148426 | 1.95683  | -0.20074 |
| 1  | 2.797667 | 2.516946 | 0.800459 |
| 1  | 2.647866 | 2.487408 | -0.96542 |
| 6  | 2.89849  | -3.2259  | 0.038428 |
| 1  | 2.508769 | -3.69307 | 0.955428 |
| 1  | 3.987068 | -3.36191 | 0.003355 |
| 1  | 2.441305 | -3.76095 | -0.80644 |
| 6  | -3.34859 | -0.66436 | -0.01306 |
| 53 | -5.44277 | -0.73312 | -0.03899 |
| 6  | 3.370093 | -0.65134 | -0.03808 |
| 53 | 5.454543 | -0.68996 | -0.04405 |
| 8  | -0.07475 | 6.314117 | 0.23647  |
| 1  | -0.11473 | 6.782071 | -0.61804 |

Cartesian coordinates for the  $S(\pi_{\text{BOD}} \rightarrow \pi_{\text{Ph}}^*)$  state of BOD-Ph (MN15/def2-SVP in DCM)

|    |          |          |          |
|----|----------|----------|----------|
| 6  | -1.21746 | 0.204647 | 0.044224 |
| 6  | -2.53834 | -1.57823 | 0.02153  |
| 6  | -2.5774  | 0.714088 | 0.0185   |
| 7  | -1.26295 | -1.18976 | 0.048728 |
| 6  | -0.00857 | 0.928772 | 0.045748 |
| 6  | 1.189713 | 0.185943 | 0.043771 |
| 5  | -0.03136 | -2.14797 | 0.093031 |
| 7  | 1.214378 | -1.2088  | 0.048775 |
| 6  | 2.558372 | 0.67476  | 0.017637 |
| 6  | 2.484121 | -1.61688 | 0.021838 |
| 9  | -0.03805 | -2.98587 | -1.00429 |
| 9  | -0.03723 | -2.87636 | 1.269983 |
| 6  | 0.055387 | 3.144385 | 1.267542 |
| 6  | 0.005806 | 2.390046 | 0.034058 |
| 6  | 0.050675 | 3.123395 | -1.21317 |
| 6  | 0.16905  | 4.518916 | 1.236554 |
| 1  | 0.201671 | 5.065952 | 2.184387 |
| 6  | 0.238548 | 5.241251 | 0.008863 |
| 6  | 0.164487 | 4.498588 | -1.20515 |
| 1  | 0.193648 | 5.029688 | -2.16219 |
| 1  | 0.004283 | 2.616369 | 2.224779 |
| 1  | -0.0042  | 2.579241 | -2.16116 |
| 1  | 0.328746 | 6.327594 | -0.00054 |
| 6  | -2.99992 | 2.138476 | 0.010993 |
| 1  | -2.59698 | 2.669328 | 0.886475 |
| 1  | -4.09599 | 2.209419 | 0.002818 |
| 1  | -2.5859  | 2.663488 | -0.86312 |
| 6  | -2.93927 | -3.00076 | -0.01184 |
| 1  | -2.79209 | -3.39233 | -1.03172 |
| 1  | -3.99406 | -3.12057 | 0.260673 |
| 1  | -2.29793 | -3.5883  | 0.658731 |
| 6  | 3.003679 | 2.091383 | 0.008771 |
| 1  | 4.100421 | 2.146271 | 0.000348 |
| 1  | 2.606469 | 2.630158 | 0.882746 |
| 1  | 2.595076 | 2.622393 | -0.86501 |
| 6  | 2.862741 | -3.04549 | -0.01048 |
| 1  | 2.215019 | -3.62167 | 0.66388  |
| 1  | 3.9166   | -3.18137 | 0.258027 |
| 1  | 2.704874 | -3.43674 | -1.02886 |
| 6  | -3.38003 | -0.40714 | 0.001346 |
| 53 | -5.45164 | -0.47125 | -0.05168 |
| 6  | 3.343343 | -0.45938 | 0.001058 |
| 53 | 5.411735 | -0.55535 | -0.0521  |

Cartesian coordinates for the  $S(\pi_{\text{BOD}} \rightarrow \pi_{\text{Ph}}^*)$  state of BOD-PhOH (MN15/def2-SVP in DCM)

|    |          |          |          |
|----|----------|----------|----------|
| 6  | 0.602948 | -0.47678 | -0.32005 |
| 6  | 1.191128 | -1.66941 | -2.09884 |
| 6  | 1.292673 | -1.65066 | 0.193163 |
| 7  | 0.583676 | -0.54466 | -1.71296 |
| 6  | 0.037534 | 0.606076 | 0.37277  |
| 6  | -0.55263 | 1.648834 | -0.35902 |
| 5  | 0.049147 | 0.556652 | -2.68091 |
| 7  | -0.55863 | 1.654168 | -1.75373 |
| 6  | -1.28079 | 2.815925 | 0.113476 |
| 6  | -1.21473 | 2.736623 | -2.17798 |
| 9  | -0.92911 | 0.036954 | -3.5057  |
| 9  | 1.093365 | 1.081068 | -3.42294 |
| 6  | 0.980641 | 1.448822 | 2.49594  |
| 6  | 0.044961 | 0.640309 | 1.85054  |
| 6  | -0.89913 | -0.13307 | 2.538532 |
| 6  | 0.969133 | 1.515254 | 3.938215 |
| 1  | 1.672518 | 2.132096 | 4.497418 |
| 6  | 0.048849 | 0.715808 | 4.632836 |
| 6  | -0.87158 | -0.11467 | 3.987022 |
| 1  | -1.57567 | -0.70738 | 4.576744 |
| 1  | 1.690862 | 2.038647 | 1.911802 |
| 1  | -1.61121 | -0.75539 | 1.993002 |
| 6  | 1.589085 | -1.98183 | 1.609372 |
| 1  | 1.943077 | -1.08982 | 2.148175 |
| 1  | 2.334928 | -2.78602 | 1.663468 |
| 1  | 0.672895 | -2.2988  | 2.130611 |
| 6  | 1.328083 | -2.05214 | -3.51965 |
| 1  | 0.337038 | -2.3179  | -3.92105 |
| 1  | 2.005633 | -2.90472 | -3.63858 |
| 1  | 1.687319 | -1.19201 | -4.1025  |
| 6  | -1.56949 | 3.190394 | 1.520214 |
| 1  | -2.32375 | 3.987583 | 1.555297 |
| 1  | -0.65351 | 3.529882 | 2.026926 |
| 1  | -1.91047 | 2.310064 | 2.087628 |
| 6  | -1.4214  | 3.033574 | -3.61076 |
| 1  | -0.51182 | 2.798432 | -4.18008 |
| 1  | -1.71051 | 4.080233 | -3.75931 |
| 1  | -2.22461 | 2.38642  | -3.99978 |
| 6  | 1.636554 | -2.37898 | -0.92703 |
| 53 | 2.635045 | -4.19003 | -0.97863 |
| 6  | -1.67655 | 3.477015 | -1.03111 |
| 53 | -2.77287 | 5.236408 | -1.1503  |
| 8  | 0.081453 | 0.775098 | 5.996495 |
| 1  | -0.6019  | 0.185832 | 6.346772 |

Cartesian coordinates for the  $S(\pi_{\text{BOD}} \rightarrow \pi_{\text{Ph}}^*)$  state of BOD-PhNO<sub>2</sub> (MN15/def2-SVP in DCM)

|    |          |          |          |
|----|----------|----------|----------|
| 6  | 0.08454  | 1.245981 | -1.03492 |
| 6  | 1.136463 | 3.121639 | -1.81601 |
| 6  | -0.21977 | 1.340334 | -2.41034 |
| 7  | 0.934352 | 2.272525 | -0.73175 |
| 6  | -0.27004 | 0.250082 | -0.0452  |
| 6  | 0.35446  | 0.294714 | 1.222201 |
| 5  | 1.805058 | 2.368951 | 0.575902 |
| 7  | 1.356004 | 1.220537 | 1.485361 |
| 6  | 0.097628 | -0.43601 | 2.423986 |
| 6  | 1.775676 | 1.085203 | 2.775505 |
| 9  | 1.585286 | 3.603062 | 1.170392 |
| 9  | 3.139122 | 2.242672 | 0.203081 |
| 6  | -0.97213 | -2.13927 | -0.29023 |
| 6  | -1.27667 | -0.76364 | -0.37643 |
| 6  | -2.56868 | -0.38037 | -0.7976  |
| 6  | -1.91682 | -3.10139 | -0.61879 |
| 1  | -1.69167 | -4.16656 | -0.57478 |
| 6  | -3.18539 | -2.68317 | -1.0287  |
| 6  | -3.52721 | -1.33225 | -1.11851 |
| 1  | -4.53394 | -1.05289 | -1.42783 |
| 1  | 0.03041  | -2.44133 | 0.020711 |
| 1  | -2.81971 | 0.681926 | -0.84866 |
| 6  | -0.92477 | 0.390152 | -3.28993 |
| 1  | -0.75153 | -0.65086 | -2.98034 |
| 1  | -0.62369 | 0.528165 | -4.3376  |
| 1  | -2.02193 | 0.535398 | -3.24419 |
| 6  | 1.971041 | 4.348209 | -1.72413 |
| 1  | 1.553732 | 5.054411 | -0.99179 |
| 1  | 2.024764 | 4.840127 | -2.70339 |
| 1  | 2.988877 | 4.097333 | -1.39272 |
| 6  | -0.96678 | -1.44373 | 2.706607 |
| 1  | -1.1662  | -1.47726 | 3.787441 |
| 1  | -0.68415 | -2.46286 | 2.395683 |
| 1  | -1.9045  | -1.20095 | 2.187408 |
| 6  | 2.825821 | 1.955168 | 3.369469 |
| 1  | 3.651726 | 2.10227  | 2.659524 |
| 1  | 3.215719 | 1.509075 | 4.293266 |
| 1  | 2.420932 | 2.951147 | 3.609114 |
| 6  | 0.435654 | 2.580076 | -2.86487 |
| 53 | 0.286281 | 3.341097 | -4.75802 |
| 6  | 1.02006  | 0.064    | 3.362762 |
| 53 | 1.221818 | -0.56807 | 5.337454 |
| 7  | -4.18452 | -3.68915 | -1.37444 |
| 8  | -5.28097 | -3.30213 | -1.74319 |
| 8  | -3.8699  | -4.86352 | -1.27733 |

Cartesian coordinates for the  $T(\pi_{\text{Ph}} \rightarrow \pi_{\text{BOD}}^*)$  state of BOD-Ph (MN15/def2-SVP in DCM)

|    |          |          |          |
|----|----------|----------|----------|
| 6  | 0.613258 | -0.50976 | -0.31161 |
| 6  | 1.17137  | -1.70526 | -2.1103  |
| 6  | 1.309567 | -1.64391 | 0.178431 |
| 7  | 0.541175 | -0.5725  | -1.68713 |
| 6  | 0.002424 | 0.579082 | 0.392621 |
| 6  | -0.61622 | 1.642966 | -0.34228 |
| 5  | -0.01388 | 0.526708 | -2.62965 |
| 7  | -0.55903 | 1.65797  | -1.71985 |
| 6  | -1.30743 | 2.79353  | 0.115652 |
| 6  | -1.19403 | 2.775468 | -2.17519 |
| 9  | -1.04309 | 0.018293 | -3.4219  |
| 9  | 1.006728 | 1.007228 | -3.44997 |
| 6  | 0.937398 | 1.450204 | 2.567691 |
| 6  | 0.01036  | 0.604503 | 1.858627 |
| 6  | -0.90879 | -0.21594 | 2.606572 |
| 6  | 0.920161 | 1.488415 | 3.947075 |
| 1  | 1.60572  | 2.144843 | 4.485214 |
| 6  | 0.025631 | 0.653369 | 4.678011 |
| 6  | -0.87661 | -0.20633 | 3.986184 |
| 1  | -1.55618 | -0.84359 | 4.554141 |
| 1  | 1.631984 | 2.066465 | 1.993623 |
| 1  | -1.60944 | -0.85159 | 2.06176  |
| 1  | 0.031536 | 0.672258 | 5.76785  |
| 6  | 1.630819 | -1.99593 | 1.593756 |
| 1  | 1.940428 | -1.11485 | 2.175642 |
| 1  | 2.449452 | -2.72918 | 1.625211 |
| 1  | 0.767544 | -2.43942 | 2.116723 |
| 6  | 1.324251 | -2.03692 | -3.55035 |
| 1  | 0.366306 | -1.91124 | -4.07451 |
| 1  | 1.681389 | -3.06691 | -3.6749  |
| 1  | 2.043339 | -1.35423 | -4.03029 |
| 6  | -1.61343 | 3.194459 | 1.521315 |
| 1  | -2.43181 | 3.928513 | 1.536184 |
| 1  | -0.74463 | 3.655652 | 2.019228 |
| 1  | -1.91656 | 2.334137 | 2.136709 |
| 6  | -1.3626  | 3.057005 | -3.62414 |
| 1  | -0.41047 | 2.912619 | -4.15405 |
| 1  | -1.72085 | 4.082262 | -3.78047 |
| 1  | -2.08706 | 2.35851  | -4.07219 |
| 6  | 1.643056 | -2.38213 | -0.97147 |
| 53 | 2.694204 | -4.17652 | -1.01252 |
| 6  | -1.65352 | 3.491485 | -1.05548 |
| 53 | -2.70547 | 5.283519 | -1.14735 |



Cartesian coordinates for the  $T(\pi_{\text{Ph}} \rightarrow \pi_{\text{BOD}}^*)$  state of BOD-PhOH (MN15/def2-SVP in DCM)

|    |          |          |          |
|----|----------|----------|----------|
| 6  | 0.487904 | -0.5624  | -0.2651  |
| 6  | 0.935757 | -1.79738 | -2.08318 |
| 6  | 1.235729 | -1.68967 | 0.18576  |
| 7  | 0.367502 | -0.63493 | -1.63567 |
| 6  | -0.00037 | 0.600179 | 0.441907 |
| 6  | -0.49882 | 1.724913 | -0.31721 |
| 5  | -0.01879 | 0.523157 | -2.58304 |
| 7  | -0.3949  | 1.727659 | -1.69139 |
| 6  | -1.24173 | 2.873438 | 0.084775 |
| 6  | -0.96895 | 2.86558  | -2.19034 |
| 9  | -1.10971 | 0.165285 | -3.38137 |
| 9  | 1.06324  | 0.839449 | -3.41044 |
| 6  | 0.499649 | 1.790552 | 2.589901 |
| 6  | 0.010142 | 0.637587 | 1.872789 |
| 6  | -0.46935 | -0.47765 | 2.655423 |
| 6  | 0.53231  | 1.81502  | 3.957303 |
| 1  | 0.937497 | 2.665729 | 4.507096 |
| 6  | 0.03403  | 0.706373 | 4.703014 |
| 6  | -0.47748 | -0.43536 | 4.024727 |
| 1  | -0.87733 | -1.26877 | 4.607396 |
| 1  | 0.891875 | 2.628568 | 2.011945 |
| 1  | -0.87222 | -1.34319 | 2.127657 |
| 6  | 1.805029 | -1.99149 | 1.534971 |
| 1  | 2.083433 | -1.08003 | 2.081    |
| 1  | 2.714254 | -2.59975 | 1.41627  |
| 1  | 1.119779 | -2.56746 | 2.178362 |
| 6  | 0.958664 | -2.16969 | -3.52224 |
| 1  | -0.03373 | -2.02475 | -3.9725  |
| 1  | 1.268424 | -3.21513 | -3.64541 |
| 1  | 1.656679 | -1.52446 | -4.07811 |
| 6  | -1.79507 | 3.24455  | 1.423495 |
| 1  | -2.7089  | 3.841446 | 1.284342 |
| 1  | -1.10449 | 3.856762 | 2.026252 |
| 1  | -2.06144 | 2.36229  | 2.020942 |
| 6  | -1.01    | 3.164263 | -3.6461  |
| 1  | -0.02428 | 2.99239  | -4.10145 |
| 1  | -1.31766 | 4.203406 | -3.81822 |
| 1  | -1.71788 | 2.494743 | -4.15915 |
| 6  | 1.460964 | -2.46231 | -0.97195 |
| 53 | 2.45035  | -4.29422 | -1.04071 |
| 6  | -1.48118 | 3.586226 | -1.10794 |
| 53 | -2.47233 | 5.412224 | -1.25795 |
| 8  | 0.071498 | 0.792396 | 6.025531 |
| 1  | -0.28992 | -0.00164 | 6.454132 |

Cartesian coordinates for the  $T(\pi_{\text{Ph}} \rightarrow \pi_{\text{BOD}}^*)$  state of BOD-PhNO<sub>2</sub> (MN15/def2-SVP in DCM)

|    |          |          |          |
|----|----------|----------|----------|
| 6  | 0.17341  | 1.224896 | -1.0702  |
| 6  | 1.366653 | 2.919787 | -1.90326 |
| 6  | -0.23387 | 1.358726 | -2.41345 |
| 7  | 1.133777 | 2.172802 | -0.78231 |
| 6  | -0.26555 | 0.314702 | -0.06037 |
| 6  | 0.25883  | 0.414222 | 1.264771 |
| 5  | 1.870222 | 2.346344 | 0.566856 |
| 7  | 1.219601 | 1.358354 | 1.5635   |
| 6  | -0.05684 | -0.32133 | 2.425559 |
| 6  | 1.541946 | 1.256288 | 2.888043 |
| 9  | 1.734917 | 3.659673 | 1.027786 |
| 9  | 3.235017 | 2.062586 | 0.418404 |
| 6  | -0.7619  | -2.01907 | -0.85248 |
| 6  | -1.22419 | -0.72662 | -0.38684 |
| 6  | -2.64472 | -0.50011 | -0.25624 |
| 6  | -1.66094 | -3.0135  | -1.16485 |
| 1  | -1.35229 | -3.99662 | -1.51747 |
| 6  | -3.02746 | -2.72648 | -1.01522 |
| 6  | -3.54131 | -1.49556 | -0.56906 |
| 1  | -4.6191  | -1.36425 | -0.48404 |
| 1  | 0.313448 | -2.17558 | -0.94614 |
| 1  | -2.98136 | 0.476121 | 0.095018 |
| 6  | -1.27405 | 0.572086 | -3.1409  |
| 1  | -1.11753 | -0.51782 | -3.06794 |
| 1  | -1.24602 | 0.809596 | -4.21674 |
| 1  | -2.29726 | 0.796572 | -2.79561 |
| 6  | 2.35682  | 4.032514 | -1.92166 |
| 1  | 2.035365 | 4.860051 | -1.27174 |
| 1  | 2.484563 | 4.413869 | -2.94332 |
| 1  | 3.330007 | 3.686862 | -1.54321 |
| 6  | -1.0649  | -1.41273 | 2.575901 |
| 1  | -0.96143 | -1.89148 | 3.563184 |
| 1  | -0.93817 | -2.21974 | 1.834022 |
| 1  | -2.10312 | -1.04594 | 2.51127  |
| 6  | 2.556147 | 2.140931 | 3.52658  |
| 1  | 3.494482 | 2.125874 | 2.952914 |
| 1  | 2.758898 | 1.810839 | 4.553948 |
| 1  | 2.21179  | 3.185612 | 3.551097 |
| 6  | 0.536347 | 2.436995 | -2.9135  |
| 53 | 0.441019 | 3.190015 | -4.85769 |
| 6  | 0.768573 | 0.233165 | 3.434109 |
| 53 | 0.81733  | -0.38114 | 5.428163 |
| 7  | -3.99942 | -3.79832 | -1.35179 |
| 8  | -5.17344 | -3.53283 | -1.2167  |
| 8  | -3.53985 | -4.85151 | -1.73424 |

Cartesian coordinates for the  $T(\pi_{\text{BOD}} \rightarrow \pi_{\text{Ph}}^*)$  state of BOD-Ph (MN15/def2-SVP in DCM)

|    |          |          |          |
|----|----------|----------|----------|
| 6  | 0.711005 | -0.40469 | -0.31384 |
| 6  | 1.115741 | -1.71972 | -2.08992 |
| 6  | 1.518902 | -1.52318 | 0.178839 |
| 7  | 0.491678 | -0.56401 | -1.69767 |
| 6  | 0.049785 | 0.658086 | 0.391341 |
| 6  | -0.53314 | 1.69349  | -0.34193 |
| 5  | 0.053385 | 0.557203 | -2.6487  |
| 7  | -0.48641 | 1.708875 | -1.74269 |
| 6  | -1.28143 | 2.874173 | 0.100755 |
| 6  | -1.14172 | 2.797129 | -2.18867 |
| 9  | -0.96033 | 0.121835 | -3.50163 |
| 9  | 1.130748 | 1.017996 | -3.41075 |
| 6  | 0.859408 | 1.356982 | 2.664328 |
| 6  | -0.02939 | 0.606375 | 1.869029 |
| 6  | -0.96732 | -0.23552 | 2.484954 |
| 6  | 0.792392 | 1.261792 | 4.062847 |
| 1  | 1.485071 | 1.843846 | 4.6749   |
| 6  | -0.15057 | 0.43474  | 4.669504 |
| 6  | -1.03951 | -0.31556 | 3.878443 |
| 1  | -1.78335 | -0.96209 | 4.348202 |
| 1  | 1.596589 | 2.007812 | 2.186825 |
| 1  | -1.64629 | -0.82584 | 1.863209 |
| 1  | -0.2006  | 0.367564 | 5.758288 |
| 6  | 2.000809 | -1.7209  | 1.570058 |
| 1  | 2.497013 | -0.80751 | 1.938606 |
| 1  | 2.699241 | -2.56667 | 1.620174 |
| 1  | 1.170151 | -1.90979 | 2.267786 |
| 6  | 1.011395 | -2.23244 | -3.46666 |
| 1  | -0.03578 | -2.48711 | -3.71396 |
| 1  | 1.636969 | -3.12078 | -3.61486 |
| 1  | 1.303315 | -1.44812 | -4.18681 |
| 6  | -1.58462 | 3.259499 | 1.500491 |
| 1  | -2.21536 | 4.157749 | 1.525517 |
| 1  | -0.65909 | 3.456475 | 2.067437 |
| 1  | -2.09272 | 2.443026 | 2.038082 |
| 6  | -1.33315 | 3.071536 | -3.62978 |
| 1  | -0.40447 | 2.861912 | -4.17973 |
| 1  | -1.65367 | 4.106583 | -3.79764 |
| 1  | -2.09837 | 2.392164 | -4.04075 |
| 6  | 1.760386 | -2.30656 | -0.92161 |
| 53 | 2.773008 | -4.11594 | -0.97582 |
| 6  | -1.62466 | 3.536079 | -1.06079 |
| 53 | -2.71804 | 5.296754 | -1.21279 |

Cartesian coordinates for the  $T(\pi_{\text{BOD}} \rightarrow \pi_{\text{Ph}}^*)$  state of BOD-PhOH (MN15/def2-SVP in DCM)

|    |          |          |          |
|----|----------|----------|----------|
| 6  | -1.22138 | 0.032452 | 0.029514 |
| 6  | -2.52554 | -1.79368 | -0.05337 |
| 6  | -2.6059  | 0.510442 | 0.065645 |
| 7  | -1.23287 | -1.37742 | -0.01574 |
| 6  | -0.00045 | 0.741204 | 0.047967 |
| 6  | 1.223434 | 0.038194 | 0.061892 |
| 5  | 0.003966 | -2.30091 | 0.099193 |
| 7  | 1.241877 | -1.37185 | 0.106305 |
| 6  | 2.605562 | 0.520501 | -0.01665 |
| 6  | 2.535465 | -1.78407 | 0.090028 |
| 9  | 0.064831 | -3.1753  | -0.98293 |
| 9  | -0.05828 | -3.0381  | 1.284513 |
| 6  | 0.24733  | 2.934264 | 1.221109 |
| 6  | -0.00445 | 2.219586 | 0.039674 |
| 6  | -0.25997 | 2.915859 | -1.14949 |
| 6  | 0.245889 | 4.334568 | 1.216267 |
| 1  | 0.434671 | 4.905389 | 2.126872 |
| 6  | -0.00909 | 5.02745  | 0.022255 |
| 6  | -0.26312 | 4.317883 | -1.16194 |
| 1  | -0.45721 | 4.862929 | -2.08938 |
| 1  | 0.446937 | 2.3916   | 2.148679 |
| 1  | -0.45894 | 2.362095 | -2.07059 |
| 6  | -3.08684 | 1.914801 | 0.172014 |
| 1  | -2.4616  | 2.50826  | 0.854567 |
| 1  | -4.12591 | 1.92943  | 0.530209 |
| 1  | -3.05709 | 2.425442 | -0.80536 |
| 6  | -2.89765 | -3.22017 | -0.1428  |
| 1  | -2.62976 | -3.62995 | -1.13288 |
| 1  | -3.97371 | -3.36028 | 0.017598 |
| 1  | -2.33008 | -3.8039  | 0.598503 |
| 6  | 3.078222 | 1.926857 | -0.12599 |
| 1  | 4.115612 | 1.947754 | -0.48835 |
| 1  | 3.047205 | 2.438524 | 0.850648 |
| 1  | 2.446072 | 2.516144 | -0.80639 |
| 6  | 2.916473 | -3.21126 | 0.098149 |
| 1  | 2.279453 | -3.76653 | 0.802281 |
| 1  | 3.973022 | -3.33642 | 0.367454 |
| 1  | 2.75676  | -3.6631  | -0.89753 |
| 6  | -3.37719 | -0.62556 | -0.00638 |
| 53 | -5.44853 | -0.71118 | -0.03923 |
| 6  | 3.381454 | -0.61449 | 0.009876 |
| 53 | 5.451299 | -0.70242 | -0.07467 |
| 8  | -0.00012 | 6.376386 | 0.061828 |
| 1  | -0.18645 | 6.743148 | -0.81545 |

Cartesian coordinates for the  $T(\pi_{\text{BOD}} \rightarrow \pi_{\text{Ph}}^*)$  state of BOD-PhNO<sub>2</sub> (MN15/def2-SVP in DCM)

|    |          |          |          |
|----|----------|----------|----------|
| 6  | 0.220583 | 1.192652 | -1.05171 |
| 6  | 1.372322 | 2.900645 | -1.87849 |
| 6  | -0.18134 | 1.30733  | -2.44152 |
| 7  | 1.164239 | 2.182366 | -0.77578 |
| 6  | -0.21474 | 0.293888 | -0.06389 |
| 6  | 0.306912 | 0.40204  | 1.235525 |
| 5  | 1.882873 | 2.417806 | 0.591059 |
| 7  | 1.252602 | 1.372889 | 1.566197 |
| 6  | 0.00219  | -0.37425 | 2.423139 |
| 6  | 1.550905 | 1.26267  | 2.860024 |
| 9  | 1.639161 | 3.697909 | 1.042724 |
| 9  | 3.239527 | 2.186115 | 0.459791 |
| 6  | -0.823   | -2.01462 | -0.84301 |
| 6  | -1.22269 | -0.73901 | -0.38417 |
| 6  | -2.6006  | -0.45992 | -0.2396  |
| 6  | -1.76182 | -2.98069 | -1.15158 |
| 1  | -1.475   | -3.96916 | -1.50738 |
| 6  | -3.14347 | -2.69248 | -1.00809 |
| 6  | -3.55113 | -1.41536 | -0.54422 |
| 1  | -4.61738 | -1.22024 | -0.44061 |
| 1  | 0.241572 | -2.23737 | -0.95571 |
| 1  | -2.91585 | 0.524851 | 0.11638  |
| 6  | -1.15955 | 0.466538 | -3.184   |
| 1  | -0.87138 | -0.59405 | -3.15962 |
| 1  | -1.22443 | 0.797557 | -4.22845 |
| 1  | -2.15851 | 0.523258 | -2.72798 |
| 6  | 2.296555 | 4.052589 | -1.92117 |
| 1  | 1.814213 | 4.918996 | -1.43943 |
| 1  | 2.546619 | 4.320334 | -2.95404 |
| 1  | 3.206842 | 3.827101 | -1.34954 |
| 6  | -0.94321 | -1.51639 | 2.551711 |
| 1  | -0.93118 | -1.90168 | 3.579371 |
| 1  | -0.68105 | -2.32906 | 1.859401 |
| 1  | -1.96864 | -1.21364 | 2.295017 |
| 6  | 2.502199 | 2.16423  | 3.542102 |
| 1  | 3.36547  | 2.362722 | 2.892847 |
| 1  | 2.828938 | 1.74241  | 4.499389 |
| 1  | 2.00773  | 3.130792 | 3.733575 |
| 6  | 0.541563 | 2.374081 | -2.93559 |
| 53 | 0.490872 | 3.148616 | -4.85045 |
| 6  | 0.781119 | 0.176995 | 3.420075 |
| 53 | 0.87711  | -0.39608 | 5.402874 |
| 7  | -4.09517 | -3.65618 | -1.32306 |
| 8  | -5.32337 | -3.37777 | -1.19108 |
| 8  | -3.71416 | -4.79056 | -1.73687 |
